# Supplementary material for: Low-quality employment trajectories and risk of common mental disorders, substance use disorders and suicide attempt: a longitudinal study of the Swedish workforce
Source: PubMed Central journal article supplement (PMC8504160; doi:10.5271/sjweh.3978), 2021-09-30
Supplement: SJWEH-47-509-S001.pdf [file SJWEH-47-509-S001.pdf]

# Low-quality employment trajectories and risk of common mental disorders, substance abuse and suicide attempt: a longitudinal study of the Swedish workforce<sup>1</sup>

by Johanna Jonsson, MSc,<sup>2</sup> Carles Muntaner, PhD, Theo Bodin, PhD, Magnus Alderling, MSc, Rebeka Balogh, MSc, Bo Burström, PhD, Letitia Davis, PhD, Virginia Gunn, PhD, Tomas Hemmingsson, PhD, Mireia Julià, PhD, Katarina Kjellberg, PhD, Bertina Kreshpaj, MSc, Cecilia Orellana, PhD, Eva Padrosa, MSc, David H Wegman, PhD, Nuria Matilla-Santander, PhD

1. *Supplementary material*

2. *Correspondence to: Johanna Jonsson, Unit of Occupational Medicine, The Institute of Environmental Medicine (IMM), Karolinska Institutet, Solnavägen 4, 113 65, Stockholm, Sweden. [E-mail: johanna.jonsson@ki.se]*

## INDEX

- Detailed description of the creation of employment trajectories.
- Table S1. Complete and exploratory fit indices for the total population, women and men.
- Table S2. Characteristics of the final employment typology with six classes.
- Table S3. Distribution of conditional item-probabilities for the six-class solution (average across 2005-2009) for the total population, women and men.
- Table S4. Grouping of 68 trajectories into 21 trajectories.
- Table S5. Sociodemographic characteristics of the total population (2005) according to trajectories.
- Table S6a. Sociodemographic characteristics of women according to trajectories.
- Table S6b. Sociodemographic characteristics of men according to trajectories.
- Table S7a. Hazard ratios (crude and adjusted) for common mental disorders for the total population, women and men.
- Table S7b. Hazard ratios (crude and adjusted) for substance use disorders for the total population, women and men.
- Table S7c. Hazard ratios (crude and adjusted) for suicide attempts for the total population, women and men.
- Table S8a. Adjusted hazard ratios for specific outcomes (depression, anxiety, stress related disorders, alcohol and non-alcohol use disorders) for the total population.
- Table S8b. Adjusted hazard ratios for specific outcomes (depression, anxiety, stress related disorders, alcohol and non-alcohol use disorders) for women.
- Table S8c. Adjusted hazard ratios for specific outcomes (depression, anxiety, stress related disorders, alcohol and non-alcohol use disorders) for men.
- Figure S1. Flow chart of the (total) study population.
- Figure S2. Directed Acyclic Graph for the effect of employment trajectories on mental health.

## Detailed description of the creation of employment trajectories

Employment trajectories spanning 2005 to 2009, for the total population and for women and men separately, were created in two steps.

### *First step*

Individuals were classified according to employment type (or unemployment) for each year of the exposure assessment window. Individuals that had been unemployed for >180 days during the year were categorized as unemployed. In order to distinguish employment types of precarious nature (or lack thereof) for the non-unemployed population, three dimensions and five items of precarious employment (PE) (as described by Kreshpaj et al 2020), were operationalized for each year by the means of available register data. This process has been thoroughly described in a previous publication (Jonsson et al 2021). Briefly, dimensions, items and their operationalization (within parenthesis) were:

1. *Employment insecurity* with three items, including (1a) contractual relationship insecurity (Directly employed by the employer; Employed by an agency; Combination of self-employed and directly employed; Self-employed with >1 employee; Solo self-employed), (1b) contractual temporariness (Stable employment. i.e., having the same employer for three consecutive years; Unstable employment. i.e., not having the same employer for three consecutive years), and (1c) multiple jobs/sectors (1-2 jobs (employers) during the year; >3 jobs during the year; >3 jobs in >1 economic sector)
2. *Income inadequacy* containing (2a) yearly income level (>200% of the median income of the study population in the specific year; 120-199% of the median; 80-119% of the median; 60-79% of the median; <60% of the median)
3. *Lack of rights and protection* including (3a) lack of unionization (operationalized as likelihood of being covered by collective bargaining agreement in the organization of employment; >90%; 71-90%; 0-70%).

For the sake of the operationalization of contractual temporariness, employer data from LISA was also retrieved for years 2003 and 2004. Thereafter, repeated measures latent class analysis (RMLCA) was performed with the items in order to identify an employment typology and each individual's employment type across the five years. Briefly, RMLCA – being an extension of latent class analysis – is a method aiming at identifying and describing underlying latent classes according to shared features as based on a set of indicators. RMLCA can be applied to longitudinal data as it considers the heterogeneity of the data across time and the emerging latent classes can hence be used to describe change across time (Nylund-Gibson & Choi, 2018). RMLCA produces a set of mutually exclusive and exhaustive classes, estimating the probability of membership in each latent class, and the probability of item-responses'

conditional on each of the latent classes (conditional item-response probabilities) (Collins & Lanza 2009). In RMLCA, the latter two are produced for each year included in the analysis. Class enumeration (i.e., deciding on the number of classes) was done by assessing fit indices, classification diagnostics, and by studying patterns in the data in order to identify a conceptually meaningful class-solution that differentiates between classes (Nylund-Gibson & Choi). The previous included Akaike information criterion (AIC), Bayesian information criterion (BIC) and Sample-size adjusted Bayesian information criterion (SABIC). The two latter included assessing entropy, average posterior probabilities, comparing class homogeneity and class separation, as well as creating and comparing conditional item-probability plots across class-solutions for each PE-item and year. **See fit statistics in table S1.** RMLCA was first applied to half of the data set, i.e., the exploratory data set. Thereafter, the selected class-solution was run on the other half of the data set, i.e., the calibration data set, to validate the model. Finally, as the estimates obtained from the exploratory data set provided an acceptable model fit in the calibration data set, the selected class-solution was run for the complete data set.

Based on a scree plot, the three initially best class-solutions were first selected and thereafter compared. The fit-indices AIC, BIC and SABIC indicated best fit (i.e., produced the smallest numbers) for the seven-class solution and closely thereafter, the six-class solution. The Entropy, however, was highest for the five-cluster solution, and lowest for the six-class solution – although the Entropy of the six-class solution was not much poorer than that of the seven-class solution. The five-class solution also had the highest AVEPP, followed by the six-class solution. In the end, the distinction of the classes in each solution and their meaningfulness (identified by visually inspecting plots of the conditional item-proportions, and in particular by comparing the unique high probabilities, of each solution) led to the decision of the six-class solution as the final solution. In the five-class solution there was no precarious employment relationship-class present, as it emerged first in the six-class solution. In the seven-class solution, however, the business ownership-class split in two (where one class was well off in terms of CBA and income, whereas the other class was not). As we are not investigating, in particular, self-employment, the addition of the second business ownership-class - although interesting - did not provide a strong enough rationale to choose the seven-class solution over the six-class solution. The process was similar in the separate analyses of women and men, although the final six-class solution was chosen after comparing them with four- and five-class solutions, where it was first in the six-class solution that a precarious employment relationship-class emerged. The classes were labelled by information gained from the conditional item-probability plots, class homogeneity and class separation. The six classes identified were: standard employment relationship with high income, standard employment relationship, business ownership, hybrid multiple job-holding, solo self-employment, and precarious

employment relationship. A summary of the characteristics of each of the six classes in the final employment typology can be found in **table S2**, and the conditional item-probabilities can be found in **table S3**. A seventh type, constituted by the unemployed, was added separately.

### *Second step*

Employment trajectories were created by grouping the combinations of unemployment and employment types (hereafter known as employment states) across the five years. Grouping was governed by adhering to patterns guided by the hypotheses of the study: constancy, fluctuation and directional mobility (upwards, downwards, within, between). Initially, there were 8230 potential combinations/trajectories. As based on a previous study where similar employment types emerged (Jonsson et al 2021), unemployment, precarious employment relationship and solo self-employment were grouped as low quality, while standard employment relationship with high income, standard employment relationship, and *business ownership* were grouped as high quality. Hybrid multiple job-holding could not be determined as either high or low quality in this study and was hence kept separate. First, 68 employment trajectories were created by adhering to the patterns. However, in order to make the number of trajectories feasible for further analysis, these trajectories were merged in order to reduce the number. The final number of trajectories reached was 21. See **Table 1** and **Table S4** for details on how specific combinations of employment states were included under these patterns and merged to the final 21 trajectories.

The rationale for manually creating trajectories, versus applying methods such as sequence analysis where trajectories result directly from the analysis, was the ability to categorize individuals in patterns considered relevant the hypotheses.

## **References**

Kreshpaj B, Orellana C, Burström B, Davis L, Hemmingsson T, Johansson G, et al. What is precarious employment? A systematic review of definitions and operationalizations from quantitative and qualitative studies. *Scandinavian journal of work, environment & health*. 2020;46(3):235-47. doi: 10.5271/sjweh.3875.

Jonsson J, Matilla-Santander N, Kreshpaj B, Orellana C, Johansson G, Burström B, et al. Exploring multidimensional operationalizations of precarious employment in Swedish register data - a typological approach and a summative score approach. *Scandinavian journal of work, environment & health*. 2021;47(2):117–26.

Nylund-Gibson K, Choi A. Ten frequently asked questions about latent class analysis. 2018;4:440-61. doi: 10.1037/tps0000176.

Collins LM, Lanza ST. *Latent Class and Latent Transition Analysis: With Applications in the Social, Behavioral, and Health Sciences*. Hoboken: Hoboken: John Wiley & Sons, Incorporated; 2009

**Table S1. Complete and exploratory fit indices for the total population, women and men.**

| <b>Complete and exploratory fit indices</b>                                                                                        |              |              |              |                |
|------------------------------------------------------------------------------------------------------------------------------------|--------------|--------------|--------------|----------------|
|                                                                                                                                    | <b>AIC</b>   | <b>BIC</b>   | <b>SABIC</b> | <b>Entropy</b> |
| <b>Total population</b>                                                                                                            |              |              |              |                |
| <b>Complete</b>                                                                                                                    |              |              |              |                |
| 6 classes                                                                                                                          | 94301864.171 | 94303064.692 | 94302800.913 | 0.681          |
| <b>Exploratory</b>                                                                                                                 |              |              |              |                |
| 5 classes                                                                                                                          | 50657839.889 | 50658593.944 | 50658419.151 | 0.827          |
| 6 classes                                                                                                                          | 47155243.118 | 47156386.101 | 47156122.322 | 0.680          |
| 7 classes                                                                                                                          | 47145420.728 | 47146756.502 | 47146448.231 | 0.694          |
| <b>Women</b>                                                                                                                       |              |              |              |                |
| <b>Complete</b>                                                                                                                    |              |              |              |                |
| 6 classes                                                                                                                          | 39082202.677 | 39083340.021 | 39083076.243 | 0.690          |
| <b>Exploratory</b>                                                                                                                 |              |              |              |                |
| 4 classes                                                                                                                          | 19601268.779 | 19601984.319 | 19601809.526 | 0.819          |
| 5 classes                                                                                                                          | 19569212.509 | 19570110.186 | 19569890.900 | 0.811          |
| 6 classes                                                                                                                          | 19546346.763 | 19547426.578 | 19547162.799 | 0.692          |
| <b>Men</b>                                                                                                                         |              |              |              |                |
| <b>Complete</b>                                                                                                                    |              |              |              |                |
| 6 classes                                                                                                                          | 52698334.651 | 52699482.926 | 52699219.148 | 0.670          |
| <b>Exploratory</b>                                                                                                                 |              |              |              |                |
| 4 classes                                                                                                                          | 26446192.612 | 26446915.396 | 26446740.604 | 0.763          |
| 5 classes                                                                                                                          | 26398356.226 | 26399262.992 | 26399043.707 | 0.605          |
| 6 classes                                                                                                                          | 26356054.044 | 26357144.792 | 26356881.014 | 0.668          |
| AIC= Akaike information criterion; BIC= Bayesian information criterion; SABIC= Sample-size adjusted Bayesian information criterion |              |              |              |                |

**Table S2. Characteristics of the final employment typology with six classes**

| <b>Class</b>                                             | <b>Characteristics</b>                                                                                                                                                                                                                                   |
|----------------------------------------------------------|----------------------------------------------------------------------------------------------------------------------------------------------------------------------------------------------------------------------------------------------------------|
| <b>Precarious Employment Relationship</b>                | Directly employed or employed by an agency with unstable employment and one job. Mainly median or around median income, high to moderate collective bargaining agreement coverage.                                                                       |
| <b>Solo Self-employment</b>                              | Solo self-employed with stable employment and one job. Poor income and poor collective bargaining agreement coverage.                                                                                                                                    |
| <b>Hybrid Multiple Job-Holding</b>                       | In combined employment (directly employed and self-employed). Unstable employment and the largest proportions of multiple jobs and multiple jobs in multiple sectors. Income and collective bargaining agreement coverage distributed across all levels. |
| <b>Business Ownership</b>                                | Self-employed with stable employment and one job. Median to high income and poor to moderate collective bargaining agreement coverage.                                                                                                                   |
| <b>Standard Employment Relationship</b>                  | Directly employed with stable employment and one job. Median or right below median income with high collective bargaining agreement coverage.                                                                                                            |
| <b>Standard Employment Relationship with high income</b> | Directly employed with stable employment and one job. High income and high collective bargaining agreement coverage.                                                                                                                                     |

**Table S3. Distribution of conditional item-probabilities for the six-class solution (average across 2005-2009) for the total population, women and men.**

|                                                 | Total population<br>N= 2,743,764 |       |      |       |       |        | Women<br>N= 1,275,850 |       |      |       |       |        | Men<br>N= 1,467,914 |       |      |      |       |        |
|-------------------------------------------------|----------------------------------|-------|------|-------|-------|--------|-----------------------|-------|------|-------|-------|--------|---------------------|-------|------|------|-------|--------|
|                                                 | PER                              | SSE   | HMJH | BO    | SER   | SER/HI | PER                   | SSE   | HMJH | BO    | SER   | SER/HI | PER                 | SSE   | HMJH | BO   | SER   | SER/HI |
| <b>Total</b>                                    | 12.9                             | 4.0   | 4.1  | 2.5   | 49.3  | 27.3   | 9.8                   | 2.8   | 4.3  | 1.2   | 60.5  | 21.3   | 8.9                 | 7.0   | 5.9  | 5.9  | 31.7  | 40.6   |
| <b>Contractual relationship insecurity</b>      |                                  |       |      |       |       |        |                       |       |      |       |       |        |                     |       |      |      |       |        |
| Directly employed by the employer               | 98.0                             | 0.0   | 4.9  | 0.0   | 92.4  | 87.4   | 98.0                  | 15.4  | 5.6  | 0.0   | 93.3  | 90.7   | 98.1                | 3.9   | 4.3  | 16.6 | 91.3  | 86.6   |
| Employed by an agency                           | 2.0                              | 0.0   | 0.0  | 0.0   | 0.3   | 0.0    | 2.0                   | 0.0   | 0.0  | 0.0   | 0.3   | 0.2    | 1.9                 | 0.0   | 0.0  | 0.0  | 0.3   | 0.1    |
| Combination of self-employed and employment     | 0.0                              | 9.8   | 95.0 | 0.0   | 7.3   | 11.8   | 0.0                   | 7.8   | 94.4 | 0.0   | 6.5   | 8.4    | 0.0                 | 16.4  | 95.5 | 0.0  | 8.4   | 12.4   |
| Self-employed with employees                    | 0.0                              | 12.3  | 0.1  | 100.0 | 0.0   | 0.8    | 0.0                   | 8.3   | 0.0  | 100.0 | 0.0   | 0.7    | 0.0                 | 10.2  | 0.2  | 83.4 | 0.0   | 0.9    |
| Solo self-employed                              | 0.0                              | 77.9  | 0.0  | 0.0   | 0.0   | 0.0    | 0.0                   | 68.6  | 0.0  | 0.0   | 0.0   | 0.0    | 0.0                 | 69.5  | 0.0  | 0.0  | 0.0   | 0.0    |
| <b>Contractual temporariness</b>                |                                  |       |      |       |       |        |                       |       |      |       |       |        |                     |       |      |      |       |        |
| Stable employment                               | 0.0                              | 87.0  | 36.0 | 88.6  | 100.0 | 85.5   | 0.3                   | 89.2  | 39.3 | 89.6  | 100.0 | 85.9   | 0.0                 | 88.3  | 33.8 | 90.5 | 100.0 | 85.3   |
| Unstable employment                             | 100.0                            | 13.0  | 64.0 | 11.4  | 0.0   | 14.5   | 99.7                  | 10.9  | 60.7 | 10.4  | 0.0   | 14.1   | 100.0               | 11.7  | 66.3 | 9.5  | 0.0   | 14.7   |
| <b>Multiple jobs/economic sectors</b>           |                                  |       |      |       |       |        |                       |       |      |       |       |        |                     |       |      |      |       |        |
| 1 or 2 employers                                | 80.4                             | 99.8  | 58.6 | 99.8  | 99.2  | 93.4   | 80.4                  | 99.9  | 54.2 | 99.7  | 99.6  | 90.8   | 80.3                | 99.8  | 55.0 | 99.8 | 97.7  | 96.1   |
| ≥2 employers                                    | 14.9                             | 0.2   | 29.3 | 0.2   | 0.3   | 5.1    | 15.0                  | 0.1   | 32.3 | 0.3   | 0.3   | 6.5    | 15.0                | 0.2   | 31.5 | 0.2  | 1.5   | 2.6    |
| ≥2 employers in >1 economic sector              | 4.7                              | 0.0   | 12.2 | 0.0   | 0.6   | 1.6    | 4.6                   | 0.0   | 13.6 | 0.0   | 0.2   | 2.7    | 4.7                 | 0.0   | 13.5 | 0.0  | 0.8   | 1.4    |
| <b>Income level</b>                             |                                  |       |      |       |       |        |                       |       |      |       |       |        |                     |       |      |      |       |        |
| ≥200% of the median                             | 3.2                              | 2.2   | 6.7  | 7.6   | 0.2   | 17.6   | 1.5                   | 2.2   | 5.6  | 4.5   | 0.0   | 12.1   | 4.8                 | 2.2   | 11.8 | 9.7  | 0.0   | 19.6   |
| 120-199% of the median                          | 13.6                             | 12.9  | 22.5 | 40.6  | 0.9   | 80.0   | 8.2                   | 8.7   | 18.8 | 30.2  | 0.3   | 82.3   | 18.3                | 12.4  | 27.6 | 48.6 | 0.0   | 80.1   |
| 80-119% of the median                           | 60.3                             | 22.5  | 44.4 | 45.1  | 72.0  | 2.4    | 56.4                  | 14.3  | 37.8 | 42.3  | 63.2  | 5.6    | 63.4                | 31.1  | 36.4 | 37.2 | 89.0  | 0.2    |
| 60-79% of the median                            | 15.0                             | 22.4  | 10.5 | 3.8   | 19.4  | 0.0    | 22.5                  | 11.0  | 17.2 | 17.9  | 27.0  | 0.0    | 8.6                 | 19.6  | 8.4  | 2.7  | 8.2   | 0.0    |
| <60% of the median                              | 7.9                              | 40.1  | 16.0 | 2.9   | 7.5   | 0.0    | 11.4                  | 63.8  | 20.6 | 5.0   | 9.5   | 0.0    | 4.9                 | 34.7  | 15.8 | 1.9  | 2.7   | 0.1    |
| <b>Collective bargaining agreement coverage</b> |                                  |       |      |       |       |        |                       |       |      |       |       |        |                     |       |      |      |       |        |
| >90%                                            | 58.3                             | 0.0   | 28.0 | 0.4   | 80.6  | 86.9   | 68.7                  | 0.0   | 40.6 | 1.1   | 88.0  | 90.5   | 49.3                | 0.0   | 30.0 | 0.1  | 72.0  | 85.6   |
| 71-90%                                          | 30.4                             | 0.0   | 22.0 | 49.0  | 13.8  | 13.1   | 23.4                  | 0.0   | 18.1 | 43.7  | 9.4   | 9.6    | 36.4                | 0.0   | 24.5 | 40.9 | 21.3  | 14.4   |
| ≤70%                                            | 11.4                             | 100.0 | 49.9 | 50.6  | 5.6   | 0.0    | 7.9                   | 100.0 | 41.3 | 55.2  | 2.6   | 0.0    | 14.3                | 100.0 | 45.5 | 59.0 | 6.7   | 0.0    |

PER=precarious employment relationship; SSE= solo self-employment; HMJH=hybrid multiple job-holding; BO= business ownership; SER= standard employment relationship; SER/HI= standard employment relationship - high income



**Table S4. Grouping of 68 trajectories into the final 21 trajectories**

| 68 trajectories                                                                                                                                                                                                                                                                                                                                               | 21 trajectories |
|---------------------------------------------------------------------------------------------------------------------------------------------------------------------------------------------------------------------------------------------------------------------------------------------------------------------------------------------------------------|-----------------|
| <b>Constant trajectories</b>                                                                                                                                                                                                                                                                                                                                  |                 |
| Classification: Spending 4-5 years in a specific employment state, or in combinations of LQ (UE, PER, SSE) or HQ (BO, SER, SER/HI) employment states, independent of order through time.                                                                                                                                                                      |                 |
| Constant UE                                                                                                                                                                                                                                                                                                                                                   | Constant UE     |
| Constant PER                                                                                                                                                                                                                                                                                                                                                  | Constant PER    |
| Constant SSE                                                                                                                                                                                                                                                                                                                                                  | Constant SSE    |
| Constant HMJH                                                                                                                                                                                                                                                                                                                                                 | Constant HMJH   |
| Constant BO                                                                                                                                                                                                                                                                                                                                                   | Constant BO     |
| Constant SER                                                                                                                                                                                                                                                                                                                                                  | Constant SER    |
| Constant SER/HI                                                                                                                                                                                                                                                                                                                                               | Constant SER/HI |
| Constant LQ                                                                                                                                                                                                                                                                                                                                                   | Constant LQ     |
| Constant HQ                                                                                                                                                                                                                                                                                                                                                   | Constant HQ     |
| Abbreviations: UE=unemployment; PER=precarious employment relationship; SSE=solo self-employment; HMJH=hybrid multiple job-holding; BO= business ownership; SER= standard employment relationship; SER/HI=standard employment relationship with high income; LQ=low quality; HQ=high quality.                                                                 |                 |
| <b>Fluctuating trajectories</b>                                                                                                                                                                                                                                                                                                                               |                 |
| Classification: Spending a minimum of two years in two different employment states with fluctuating movement in-and-out of the these. Combinations of LQ- and HQ-employment states are also included (if a minimum of two years in the LQ- and HQ-classes, respectively).                                                                                     |                 |
| FL PER and UE                                                                                                                                                                                                                                                                                                                                                 | FL LQ           |
| FL PER and SSE                                                                                                                                                                                                                                                                                                                                                |                 |
| FL UE and SSE                                                                                                                                                                                                                                                                                                                                                 |                 |
| FL SSE and HMJH                                                                                                                                                                                                                                                                                                                                               | FL LQ and HMJH  |
| FL PER and HMJH                                                                                                                                                                                                                                                                                                                                               |                 |
| FL UE and HMJH                                                                                                                                                                                                                                                                                                                                                |                 |
| FL HMJH and LQ                                                                                                                                                                                                                                                                                                                                                |                 |
| FL PER and SER                                                                                                                                                                                                                                                                                                                                                | FL LQ and HQ    |
| FL PER and SER/HI                                                                                                                                                                                                                                                                                                                                             |                 |
| FL SSE and SER                                                                                                                                                                                                                                                                                                                                                |                 |
| FL SSE and SER/HI                                                                                                                                                                                                                                                                                                                                             |                 |
| FL SSE and BO                                                                                                                                                                                                                                                                                                                                                 |                 |
| FL LQ and HQ                                                                                                                                                                                                                                                                                                                                                  |                 |
| FL UE and SER/HI                                                                                                                                                                                                                                                                                                                                              |                 |
| FL UE and SER                                                                                                                                                                                                                                                                                                                                                 |                 |
| FL SER and HMJH                                                                                                                                                                                                                                                                                                                                               | FL HQ and HMJH  |
| FL SER/HI and HMJH                                                                                                                                                                                                                                                                                                                                            |                 |
| FL HMJH and BO                                                                                                                                                                                                                                                                                                                                                |                 |
| FL HMJH and HQ                                                                                                                                                                                                                                                                                                                                                |                 |
| FL SER and SER/HI                                                                                                                                                                                                                                                                                                                                             | FL HQ           |
| FL BO and SER                                                                                                                                                                                                                                                                                                                                                 |                 |
| FL BO and SER/HI                                                                                                                                                                                                                                                                                                                                              |                 |
| Abbreviations: FL=fluctuating; UE=unemployment; PER=precarious employment relationship; SSE=solo self-employment; HMJH=hybrid multiple job-holding; BO= business ownership; SER= standard employment relationship; SER/HI=standard employment relationship with high income; LQ=low quality; HQ=high quality.                                                 |                 |
| <b>Trajectories characterized by mobility</b>                                                                                                                                                                                                                                                                                                                 |                 |
| Classification: Spending a minimum of one year in one employment state at the beginning of the trajectory, followed by a minimum of two years in another employment state at the end of the trajectory. The last two years could also be characterized by combinations of LQ- or HQ-employment states. Mobility can be upwards, downwards, within or between. |                 |
| BW PER and UE                                                                                                                                                                                                                                                                                                                                                 | WI LQ           |
| BW SSE and UE                                                                                                                                                                                                                                                                                                                                                 |                 |
| BW SSE and PER                                                                                                                                                                                                                                                                                                                                                |                 |
| BW PER and SSE                                                                                                                                                                                                                                                                                                                                                |                 |
| BW UE and PER                                                                                                                                                                                                                                                                                                                                                 |                 |

|                                                                                                                                                                                                                                                                                                                                               |              |
|-----------------------------------------------------------------------------------------------------------------------------------------------------------------------------------------------------------------------------------------------------------------------------------------------------------------------------------------------|--------------|
| BW UE and SSE                                                                                                                                                                                                                                                                                                                                 |              |
| BW SER and SER/HI                                                                                                                                                                                                                                                                                                                             | WI HQ        |
| BW SER and BO                                                                                                                                                                                                                                                                                                                                 |              |
| BW BO and SER/HI                                                                                                                                                                                                                                                                                                                              |              |
| BW SER/HI and SER                                                                                                                                                                                                                                                                                                                             |              |
| BW BO and SER                                                                                                                                                                                                                                                                                                                                 |              |
| BW SER/HI and BO                                                                                                                                                                                                                                                                                                                              |              |
| BW LQ and HMJH                                                                                                                                                                                                                                                                                                                                |              |
| BW HMJH and LQ                                                                                                                                                                                                                                                                                                                                |              |
| BW HQ and HMJH                                                                                                                                                                                                                                                                                                                                | BW HQ & HMJH |
| BW HMJH and HQ                                                                                                                                                                                                                                                                                                                                |              |
| DW BO to UE                                                                                                                                                                                                                                                                                                                                   | DW HQ to LQ  |
| DW BO to PER                                                                                                                                                                                                                                                                                                                                  |              |
| DW SER to PER                                                                                                                                                                                                                                                                                                                                 |              |
| DW SER/HI to PER                                                                                                                                                                                                                                                                                                                              |              |
| DW BO to PER-SE                                                                                                                                                                                                                                                                                                                               |              |
| DW SER/HI to SSE                                                                                                                                                                                                                                                                                                                              |              |
| DW SER to SSE                                                                                                                                                                                                                                                                                                                                 |              |
| DW SER to UE                                                                                                                                                                                                                                                                                                                                  |              |
| DW SER/HI to UE                                                                                                                                                                                                                                                                                                                               |              |
| DW HQ to LQ                                                                                                                                                                                                                                                                                                                                   |              |
| UW PER to SER                                                                                                                                                                                                                                                                                                                                 | UW LQ to HQ  |
| UW PER to SER/HI                                                                                                                                                                                                                                                                                                                              |              |
| UW PER to BO                                                                                                                                                                                                                                                                                                                                  |              |
| UW SSE to BO                                                                                                                                                                                                                                                                                                                                  |              |
| UW SSE to SER/HI                                                                                                                                                                                                                                                                                                                              |              |
| UW SSE to SER                                                                                                                                                                                                                                                                                                                                 |              |
| UW UE to SER                                                                                                                                                                                                                                                                                                                                  |              |
| UW UE to SER/HI                                                                                                                                                                                                                                                                                                                               |              |
| UW UE to BO                                                                                                                                                                                                                                                                                                                                   |              |
| UW LQ to HQ                                                                                                                                                                                                                                                                                                                                   |              |
| Abbreviations: BW=between; WI=within; DW= downward; UW=upward; UE=unemployment; PER=precarious employment relationship; SSE=solo self-employment; HMJH=hybrid multiple job-holding; BO= business ownership; SER= standard employment relationship; SER/HI=standard employment relationship with high income; LQ=low quality; HQ=high quality. |              |
| <b>Other trajectories</b>                                                                                                                                                                                                                                                                                                                     |              |
| Any other combination of employment states.                                                                                                                                                                                                                                                                                                   |              |
| Other                                                                                                                                                                                                                                                                                                                                         | Other        |
| Note: if potential combinations of employment states matched several patterns, grouping was done in the following hierarchy: fluctuation, constancy, mobility.                                                                                                                                                                                |              |

**Table S5. Sociodemographic characteristics of the total population (2005) according to employment trajectories (n= 2,743,764).**

|                                                         | Constant |         |      |      |      |      |      |      |      | Fluctuating |      |             |             |           | Mobility |                |                |       |             | Other       | Total |       |
|---------------------------------------------------------|----------|---------|------|------|------|------|------|------|------|-------------|------|-------------|-------------|-----------|----------|----------------|----------------|-------|-------------|-------------|-------|-------|
|                                                         | SER      | SER /HI | BO   | HMJH | SSE  | PER  | UE   | HQ   | LQ   | HQ          | LQ   | HQ and HMJH | LQ and HMJH | LQ and HQ | WI HQ    | BW HQ and HMJH | BW LQ and HMJH | WI LQ | UW LQ to HQ | DW HQ to LQ |       | Other |
|                                                         | %        | %       | %    | %    | %    | %    | %    | %    | %    | %           | %    | %           | %           | %         | %        | %              | %              | %     | %           | %           | %     | %     |
| <b>Total</b>                                            | 38.6     | 21.8    | 1.7  | 1.6  | 2.9  | 3.8  | 0.05 | 4.9  | 0.6  | 2.4         | 0.07 | 1.1         | 0.50        | 7.9       | 0.2      | 1.4            | 0.57           | 0.02  | 4.6         | 4.2         | 1.46  | 100   |
| <b>Age (2005)</b>                                       |          |         |      |      |      |      |      |      |      |             |      |             |             |           |          |                |                |       |             |             |       |       |
| 18 to 24y                                               | 3.1      | 0.5     | 0.5  | 2.9  | 0.9  | 20.1 | 3.6  | 2.9  | 9.1  | 2.4         | 8.8  | 7.5         | 7.4         | 8.2       | 3.0      | 7.3            | 7.1            | 8.5   | 10.2        | 7.2         | 7.2   | 4.1   |
| 25 to 34y                                               | 19.0     | 15.7    | 13.1 | 17.5 | 11.0 | 36.0 | 22.8 | 26.3 | 29.6 | 24.4        | 28.3 | 29.7        | 24.6        | 30.9      | 24.8     | 24.5           | 24.9           | 27.0  | 32.6        | 29.3        | 27.7  | 21.4  |
| 35 to 44y                                               | 28.5     | 33.3    | 33.8 | 29.1 | 27.7 | 24.5 | 27.7 | 32.4 | 31.4 | 31.6        | 30.4 | 30.9        | 29.9        | 30.7      | 32.4     | 29.9           | 30.0           | 29.6  | 28.0        | 31.4        | 32.3  | 30.2  |
| 45 to 54y                                               | 30.6     | 32.3    | 33.8 | 31.8 | 34.5 | 14.3 | 26.4 | 24.3 | 20.8 | 27.2        | 23.6 | 21.9        | 24.7        | 20.7      | 26.0     | 24.6           | 24.7           | 23.7  | 20.2        | 21.5        | 22.2  | 28.2  |
| 55 to 61y                                               | 18.8     | 18.2    | 18.8 | 18.7 | 25.8 | 5.2  | 19.5 | 14.1 | 9.1  | 14.3        | 8.9  | 10.1        | 13.5        | 9.4       | 13.8     | 13.5           | 13.4           | 11.3  | 8.9         | 10.5        | 10.6  | 16.1  |
| <b>Level of education (2005)</b>                        |          |         |      |      |      |      |      |      |      |             |      |             |             |           |          |                |                |       |             |             |       |       |
| Primary/secondary school                                | 71.8     | 39.3    | 75.4 | 60.9 | 78.5 | 74.3 | 75.8 | 58.2 | 75.7 | 60.6        | 77.4 | 69.0        | 67.1        | 70.3      | 68.2     | 59.9           | 66.3           | 75.6  | 68.1        | 70.3        | 64.7  | 63.2  |
| Tertiary education <3y                                  | 13.4     | 21.3    | 12.7 | 16.6 | 10.8 | 11.8 | 11.2 | 16.0 | 11.6 | 15.6        | 10.5 | 12.9        | 15.0        | 12.5      | 13.6     | 15.5           | 15.6           | 10.5  | 12.2        | 13.2        | 15.2  | 15.2  |
| Tertiary education ≥3y                                  | 14.8     | 39.4    | 12.0 | 22.6 | 10.7 | 13.9 | 13.0 | 25.8 | 12.7 | 23.8        | 12.1 | 18.0        | 17.9        | 17.1      | 18.2     | 24.8           | 18.1           | 13.9  | 19.7        | 16.4        | 20.1  | 21.6  |
| <b>Marital status (2005)</b>                            |          |         |      |      |      |      |      |      |      |             |      |             |             |           |          |                |                |       |             |             |       |       |
| Couple with children                                    | 48.1     | 53.7    | 59.9 | 53.0 | 49.9 | 41.0 | 33.7 | 50.4 | 44.5 | 50.0        | 37.3 | 48.1        | 49.6        | 47.1      | 47.4     | 55.0           | 49.6           | 41.2  | 45.2        | 47.8        | 51.7  | 49.5  |
| Couple with no children                                 | 16.1     | 14.9    | 16.9 | 14.7 | 18.0 | 6.7  | 12.1 | 12.2 | 8.6  | 12.7        | 8.6  | 10.2        | 11.2        | 9.8       | 13.3     | 12.9           | 10.8           | 10.3  | 9.7         | 10.4        | 10.3  | 13.9  |
| Single with children                                    | 9.4      | 5.9     | 4.7  | 7.2  | 7.3  | 9.3  | 13.6 | 7.2  | 9.5  | 7.2         | 11.4 | 8.1         | 7.8         | 8.3       | 7.0      | 6.6            | 7.9            | 7.1   | 8.5         | 8.7         | 7.4   | 8.0   |
| Single                                                  | 26.4     | 25.5    | 18.5 | 25.1 | 24.8 | 43.0 | 40.5 | 30.2 | 37.4 | 30.1        | 42.7 | 33.7        | 31.4        | 34.8      | 32.3     | 25.5           | 31.6           | 41.4  | 36.6        | 33.1        | 30.6  | 28.5  |
| <b>Parental mental disorder diagnosis</b>               |          |         |      |      |      |      |      |      |      |             |      |             |             |           |          |                |                |       |             |             |       |       |
| No                                                      | 81.4     | 84.1    | 85.3 | 85.7 | 79.3 | 84.2 | 65.5 | 83.6 | 77.7 | 83.1        | 74.7 | 83.3        | 83.3        | 82.9      | 83.9     | 86.2           | 83.6           | 75.0  | 83.4        | 82.3        | 83.8  | 82.7  |
| Yes                                                     | 11.5     | 11.0    | 11.0 | 10.9 | 12.0 | 11.2 | 13.4 | 10.7 | 12.0 | 10.9        | 12.2 | 10.7        | 10.9        | 10.7      | 10.7     | 10.5           | 10.8           | 11.8  | 10.8        | 11.3        | 10.8  | 11.2  |
| Unknown                                                 | 7.1      | 4.9     | 3.7  | 3.5  | 8.7  | 4.6  | 21.0 | 5.7  | 10.3 | 5.9         | 13.1 | 6.0         | 5.8         | 6.3       | 5.4      | 3.3            | 5.6            | 13.2  | 5.8         | 6.5         | 5.4   | 6.1   |
| <b>Parental socioeconomic position during childhood</b> |          |         |      |      |      |      |      |      |      |             |      |             |             |           |          |                |                |       |             |             |       |       |
| Manual                                                  | 51.1     | 37.9    | 43.9 | 35.2 | 39.1 | 45.3 | 9.5  | 43.1 | 34.5 | 45.7        | 21.8 | 44.6        | 32.8        | 45.5      | 46.5     | 38.5           | 34.8           | 33.7  | 43.8        | 45.4        | 37.9  | 44.9  |
| Non-manual                                              | 26.9     | 45.8    | 35.1 | 35.3 | 28.0 | 33.3 | 5.3  | 36.8 | 23.0 | 34.3        | 13.5 | 33.4        | 34.6        | 33.1      | 33.9     | 35.8           | 35.3           | 26.8  | 32.3        | 33.3        | 37.2  | 33.7  |

|                                                                                                                                                                                                                                                                                                                       |      |     |      |      |      |      |      |      |      |      |      |      |      |      |      |      |      |      |      |      |      |      |
|-----------------------------------------------------------------------------------------------------------------------------------------------------------------------------------------------------------------------------------------------------------------------------------------------------------------------|------|-----|------|------|------|------|------|------|------|------|------|------|------|------|------|------|------|------|------|------|------|------|
| Farmers. self-employed                                                                                                                                                                                                                                                                                                | 8.8  | 6.7 | 12.7 | 20.2 | 18.5 | 7.9  | 1.4  | 8.4  | 6.1  | 8.3  | 3.1  | 8.7  | 15.2 | 7.6  | 8.1  | 16.8 | 15.3 | 6.4  | 7.6  | 7.9  | 11.2 | 8.9  |
| Unknown                                                                                                                                                                                                                                                                                                               | 13.2 | 9.7 | 8.4  | 9.3  | 14.4 | 13.5 | 83.8 | 11.7 | 36.4 | 11.8 | 61.6 | 13.2 | 17.3 | 13.8 | 11.4 | 8.9  | 14.6 | 33.0 | 16.3 | 13.4 | 13.7 | 12.6 |
| Note: PER=precarious employment relationship; SSE= solo self-employment; HMJH=hybrid multiple job-holding; BO= business ownership; SER= standard employment relationship; SER/HI= standard employment relationship with high income; LQ=low quality; HQ=high quality; WI=within; BW=between; UW=upwards; DW=downwards |      |     |      |      |      |      |      |      |      |      |      |      |      |      |      |      |      |      |      |      |      |      |

**Table S6a. Sociodemographic characteristics of women according to employment trajectories (n= 1,275,850)**

|                                  | Constant |         |      |      |      |      |      |      |      | Fluctuating |      |             |             |           | Mobility |                |                |       |             | Other       | Total |       |
|----------------------------------|----------|---------|------|------|------|------|------|------|------|-------------|------|-------------|-------------|-----------|----------|----------------|----------------|-------|-------------|-------------|-------|-------|
|                                  | SER      | SER /HI | BO   | HMJH | SSE  | PER  | UE   | HQ   | LQ   | HQ          | LQ   | HQ and HMJH | LQ and HMJH | LQ and HQ | WI HQ    | BW HQ and HMJH | BW LQ and HMJH | WI LQ | UW LQ to HQ | DW HQ to LQ |       | Other |
|                                  | %        | %       | %    | %    | %    | %    | %    | %    | %    | %           | %    | %           | %           | %         | %        | %              | %              | %     | %           | %           |       | %     |
| <b>Total</b>                     | 52.5     | 12.9    | 0.68 | 1.46 | 1.75 | 3.83 | 0.07 | 4    | 0.6  | 1.83        | 0.06 | 0.86        | 0.36        | 7.46      | 0.15     | 1.21           | 0.44           | 0.01  | 4.77        | 4.02        | 1.01  | 100   |
| <b>Age (2005)</b>                |          |         |      |      |      |      |      |      |      |             |      |             |             |           |          |                |                |       |             |             |       |       |
| 18 to 24y                        | 2.3      | 0.1     | 0.4  | 2.2  | 1.3  | 21.2 | 6.2  | 1.3  | 10.8 | 0.9         | 7.0  | 7.1         | 9.5         | 7.8       | 2.4      | 1.5            | 7.5            | 6.3   | 9.3         | 7.1         | 8.3   | 3.7   |
| 25 to 34y                        | 17.7     | 12.5    | 10.9 | 14.6 | 11.5 | 36.0 | 22.7 | 24.0 | 27.2 | 25.3        | 29.3 | 29.2        | 23.0        | 30.6      | 23.3     | 16.6           | 23.5           | 24.1  | 32.3        | 28.9        | 25.3  | 20.2  |
| 35 to 44y                        | 28.9     | 32.1    | 31.9 | 30.2 | 28.0 | 24.5 | 31.4 | 33.9 | 31.6 | 29.6        | 31.0 | 31.4        | 31.1        | 31.3      | 31.3     | 32.5           | 32.3           | 35.1  | 28.0        | 31.9        | 33.5  | 29.8  |
| 45 to 54y                        | 31.9     | 35.3    | 36.8 | 34.9 | 33.4 | 13.6 | 23.6 | 26.1 | 19.8 | 28.5        | 22.9 | 22.3        | 24.9        | 21        | 28.2     | 33.8           | 24.7           | 21.3  | 21.4        | 21.9        | 23.2  | 29.5  |
| 55 to 61y                        | 19.3     | 19.9    | 20.0 | 18.1 | 25.8 | 4.8  | 16.1 | 14.7 | 10.6 | 15.7        | 9.8  | 9.9         | 11.6        | 9.3       | 14.9     | 15.6           | 12.0           | 13.2  | 9.0         | 10.2        | 9.7   | 16.7  |
|                                  |          |         |      |      |      |      |      |      |      |             |      |             |             |           |          |                |                |       |             |             |       |       |
| <b>Country of birth</b>          |          |         |      |      |      |      |      |      |      |             |      |             |             |           |          |                |                |       |             |             |       |       |
| Sweden                           | 89.8     | 90.6    | 91.2 | 92.9 | 87.5 | 90.8 | 75.8 | 89.9 | 86   | 90.1        | 82.5 | 93.2        | 88.9        | 88.9      | 89.7     | 92.8           | 90.9           | 79.2  | 89.6        | 88.7        | 91.0  | 89.9  |
| Within EU-28                     | 7.0      | 6.9     | 6.6  | 5.0  | 8.3  | 5.2  | 11.9 | 6.9  | 8.0  | 6.7         | 9.3  | 4.7         | 6.9         | 6.9       | 6.9      | 5.0            | 5.7            | 8.9   | 6.6         | 6.9         | 5.6   | 6.8   |
| Outside EU-28                    | 3.2      | 2.4     | 2.2  | 2.1  | 4.1  | 4.0  | 12.4 | 3.2  | 5.9  | 3.2         | 8.1  | 2.1         | 4.1         | 4.1       | 3.4      | 2.2            | 3.3            | 11.9  | 3.9         | 4.4         | 3.4   | 3.3   |
| <b>Level of education (2005)</b> |          |         |      |      |      |      |      |      |      |             |      |             |             |           |          |                |                |       |             |             |       |       |
| Primary/secondary school         | 66.1     | 24.9    | 68.8 | 52.0 | 73.7 | 66.6 | 69.4 | 39.9 | 73.1 | 37.9        | 70.4 | 62.4        | 61.4        | 63.9      | 53.1     | 49.4           | 57.9           | 74.1  | 61.2        | 63.7        | 57.3  | 58.2  |
| Tertiary education <3y           | 15.6     | 21.8    | 14.9 | 18.6 | 12.8 | 14.1 | 14.0 | 19.4 | 12.6 | 18.7        | 12.8 | 14.5        | 16.6        | 14.2      | 17.8     | 17.2           | 18.3           | 9.8   | 13.7        | 15.5        | 17.5  | 16.4  |
| Tertiary education ≥3y           | 18.4     | 53.3    | 16.3 | 29.4 | 13.5 | 19.2 | 16.5 | 40.7 | 14.3 | 43.3        | 16.7 | 23.0        | 22.1        | 21.8      | 29.1     | 33.4           | 23.8           | 16.1  | 25.2        | 20.8        | 25.2  | 25.4  |
|                                  |          |         |      |      |      |      |      |      |      |             |      |             |             |           |          |                |                |       |             |             |       |       |
| <b>Marital status (2005)</b>     |          |         |      |      |      |      |      |      |      |             |      |             |             |           |          |                |                |       |             |             |       |       |
| Couple with children             | 50.0     | 47.3    | 55.2 | 51.5 | 45.1 | 40.5 | 40.5 | 49.8 | 44.6 | 47.3        | 38.4 | 48.1        | 46.6        | 47.3      | 41.3     | 55.2           | 46.7           | 36.2  | 44.8        | 47.9        | 50.1  | 48.6  |
| Couple with no children          | 17.8     | 16.4    | 22.4 | 16.0 | 22.1 | 7.1  | 15.1 | 13.0 | 10.6 | 15.0        | 10.7 | 11.2        | 11.3        | 10.8      | 15.3     | 14.4           | 11.9           | 14.9  | 10.6        | 11.1        | 11.2  | 15.7  |
| Single with children             | 11.5     | 11.8    | 8.2  | 11.0 | 11.0 | 12.8 | 15.9 | 12.0 | 14.7 | 12.2        | 19.1 | 12.2        | 12.6        | 12.4      | 12.8     | 10.2           | 12.9           | 14.9  | 12.2        | 13.4        | 12.4  | 11.8  |
| Single                           | 20.7     | 24.5    | 14.2 | 21.5 | 21.7 | 39.6 | 28.5 | 25.2 | 30.1 | 25.5        | 31.8 | 28.5        | 29.4        | 29.5      | 30.7     | 20.1           | 28.5           | 33.9  | 32.5        | 27.7        | 26.4  | 23.9  |
|                                  |          |         |      |      |      |      |      |      |      |             |      |             |             |           |          |                |                |       |             |             |       |       |
| <b>Age (2009)</b>                |          |         |      |      |      |      |      |      |      |             |      |             |             |           |          |                |                |       |             |             |       |       |

|                                                         |      |      |      |      |      |      |      |      |      |      |      |      |      |      |      |      |      |      |      |      |      |      |
|---------------------------------------------------------|------|------|------|------|------|------|------|------|------|------|------|------|------|------|------|------|------|------|------|------|------|------|
| 22 to 34y                                               | 10.7 | 4.7  | 4.3  | 9.0  | 6.1  | 44.3 | 18.5 | 12.3 | 26.6 | 11.7 | 21.4 | 23.3 | 21.4 | 25   | 14.6 | 8.7  | 19.9 | 19.0 | 28.4 | 22.5 | 21.4 | 13.8 |
| 35 to 44y                                               | 26.1 | 25.9 | 24.9 | 24.3 | 21.7 | 28.9 | 29.8 | 34.2 | 30.8 | 32.9 | 33.2 | 32.9 | 29.6 | 33.4 | 29.3 | 28.0 | 30.5 | 31.0 | 31.0 | 33.6 | 32.7 | 27.8 |
| 45 to 54y                                               | 31.0 | 35.2 | 35.8 | 35.5 | 32.5 | 17.5 | 27.2 | 29.3 | 25.1 | 28.5 | 27.2 | 26.0 | 29.4 | 24.9 | 29.9 | 35.1 | 28.7 | 28.2 | 23.7 | 25.9 | 28.4 | 30.0 |
| 55 to 65y                                               | 32.2 | 34.2 | 35.0 | 31.1 | 39.7 | 9.3  | 24.5 | 24.2 | 17.4 | 26.9 | 18.2 | 17.9 | 19.6 | 16.7 | 26.2 | 28.2 | 20.9 | 21.8 | 16.9 | 18.1 | 17.4 | 28.4 |
|                                                         |      |      |      |      |      |      |      |      |      |      |      |      |      |      |      |      |      |      |      |      |      |      |
| <b>Level of education (2009)</b>                        |      |      |      |      |      |      |      |      |      |      |      |      |      |      |      |      |      |      |      |      |      |      |
| Primary/secondary school                                | 65.2 | 24.6 | 68.6 | 50.1 | 73.2 | 61.8 | 67.4 | 39.1 | 70.9 | 37.3 | 68.9 | 60.5 | 57.5 | 62   | 52.4 | 48.0 | 55.0 | 73.6 | 59.6 | 61.1 | 54.0 | 57.0 |
| Tertiary education <3y                                  | 15.5 | 21.5 | 14.9 | 18.6 | 12.9 | 14.0 | 15.0 | 18.9 | 13.4 | 18.4 | 13.0 | 13.9 | 17.8 | 13.5 | 17.4 | 17.0 | 18.6 | 9.8  | 13.5 | 15.0 | 18.1 | 16.3 |
| Tertiary education ≥3y                                  | 19.3 | 53.8 | 16.5 | 31.2 | 13.9 | 24.2 | 17.6 | 42.0 | 15.7 | 44.2 | 18.2 | 25.6 | 24.7 | 24.5 | 30.2 | 35.0 | 26.4 | 16.7 | 26.9 | 24.0 | 27.8 | 26.7 |
|                                                         |      |      |      |      |      |      |      |      |      |      |      |      |      |      |      |      |      |      |      |      |      |      |
| <b>Marital status (2009)</b>                            |      |      |      |      |      |      |      |      |      |      |      |      |      |      |      |      |      |      |      |      |      |      |
| Couple with children                                    | 45.8 | 43.1 | 48.6 | 46.3 | 39.7 | 44.9 | 37.5 | 49.2 | 43.7 | 50.5 | 38.6 | 49.3 | 45.4 | 49.2 | 45.1 | 49.9 | 45.4 | 33.9 | 48.8 | 48.1 | 48.8 | 46.1 |
| Couple with no children                                 | 23.4 | 22.3 | 29.3 | 22.3 | 27.9 | 9.8  | 17.5 | 17.1 | 14.4 | 17.8 | 13.1 | 14.7 | 15.3 | 14   | 19.7 | 20.8 | 16.5 | 16.1 | 14.1 | 14.5 | 15.0 | 20.7 |
| Single with children                                    | 10.7 | 11.0 | 8.1  | 10.6 | 10.1 | 12.2 | 16.4 | 12.0 | 14.6 | 11.1 | 18.2 | 11.8 | 13.1 | 12   | 11.8 | 10.1 | 12.5 | 16.7 | 11.7 | 12.5 | 12.4 | 11.1 |
| Single                                                  | 20.1 | 23.6 | 14.0 | 20.9 | 22.3 | 33.2 | 28.6 | 21.7 | 27.3 | 20.6 | 30.1 | 24.1 | 26.2 | 24.7 | 23.4 | 19.2 | 25.6 | 33.3 | 25.3 | 24.8 | 23.8 | 22.1 |
|                                                         |      |      |      |      |      |      |      |      |      |      |      |      |      |      |      |      |      |      |      |      |      |      |
| <b>Mental disorder diagnosis before 2003</b>            |      |      |      |      |      |      |      |      |      |      |      |      |      |      |      |      |      |      |      |      |      |      |
| No                                                      | 96.9 | 97.9 | 97.6 | 97.2 | 96.9 | 96.6 | 95.6 | 97.5 | 95.8 | 97.1 | 94.6 | 96.9 | 96.6 | 96.8 | 97.3 | 97.7 | 96.9 | 95.4 | 96.8 | 96.8 | 96.8 | 97.0 |
| Yes                                                     | 3.1  | 2.1  | 2.4  | 2.8  | 3.1  | 3.4  | 4.4  | 2.5  | 4.2  | 2.9  | 5.4  | 3.1  | 3.4  | 3.2  | 2.7  | 2.3  | 3.1  | 4.6  | 3.2  | 3.2  | 3.2  | 3.0  |
|                                                         |      |      |      |      |      |      |      |      |      |      |      |      |      |      |      |      |      |      |      |      |      |      |
| <b>Parental mental disorder diagnosis</b>               |      |      |      |      |      |      |      |      |      |      |      |      |      |      |      |      |      |      |      |      |      |      |
| No                                                      | 81.6 | 82.6 | 83.1 | 84.6 | 79.0 | 84.6 | 71.4 | 82.8 | 79.2 | 82.7 | 76.4 | 83.0 | 82.9 | 82.7 | 82.9 | 85.5 | 83.4 | 74.7 | 82.9 | 81.6 | 83.9 | 82.2 |
| Yes                                                     | 11.4 | 11.0 | 11.0 | 10.9 | 12.3 | 10.8 | 11.1 | 10.8 | 12.3 | 10.9 | 12.1 | 10.6 | 11.5 | 10.6 | 10.8 | 10.5 | 11.2 | 12.1 | 10.8 | 11.3 | 10.9 | 11.2 |
| Unknown                                                 | 6.9  | 6.5  | 5.9  | 4.5  | 8.8  | 4.6  | 17.4 | 6.4  | 8.6  | 6.4  | 11.5 | 6.4  | 5.6  | 6.6  | 6.3  | 4.1  | 5.3  | 13.2 | 6.2  | 7.1  | 5.3  | 6.6  |
|                                                         |      |      |      |      |      |      |      |      |      |      |      |      |      |      |      |      |      |      |      |      |      |      |
| <b>Parental socioeconomic position during childhood</b> |      |      |      |      |      |      |      |      |      |      |      |      |      |      |      |      |      |      |      |      |      |      |
| Manual                                                  | 50.2 | 33.0 | 40.4 | 34.8 | 41.8 | 42.9 | 23.6 | 37.6 | 36.4 | 38.4 | 28.2 | 43.2 | 33.4 | 44   | 42.2 | 36.5 | 34.7 | 24.1 | 42.5 | 43.7 | 37.5 | 44.8 |
| Non-manual                                              | 28.1 | 49.1 | 38.0 | 39.3 | 33.0 | 35.3 | 18.8 | 42.1 | 25.3 | 41.4 | 18.8 | 34.7 | 38.5 | 34.3 | 37.8 | 38.1 | 39.7 | 27.0 | 33.7 | 34.7 | 38.8 | 33.6 |

|                                                                                                                                                                                                                                                                                                                      |      |      |      |      |      |      |      |      |      |      |      |      |      |      |      |      |      |      |      |      |      |      |
|----------------------------------------------------------------------------------------------------------------------------------------------------------------------------------------------------------------------------------------------------------------------------------------------------------------------|------|------|------|------|------|------|------|------|------|------|------|------|------|------|------|------|------|------|------|------|------|------|
| Farmers, self-employed                                                                                                                                                                                                                                                                                               | 9.0  | 6.7  | 10.7 | 15.4 | 10.1 | 8.5  | 5.3  | 8.2  | 7.2  | 8.2  | 5.4  | 8.7  | 10.8 | 7.9  | 7.6  | 15.9 | 10.8 | 5.7  | 7.8  | 7.9  | 10.4 | 8.7  |
| Unknown                                                                                                                                                                                                                                                                                                              | 12.7 | 11.2 | 10.9 | 10.5 | 15.1 | 13.2 | 52.3 | 12.1 | 31.2 | 12.0 | 47.6 | 13.4 | 17.4 | 13.8 | 12.4 | 9.5  | 14.8 | 43.1 | 16.0 | 13.6 | 13.3 | 12.9 |
| Note: PER=precarious employment relationship; SSE= solo self-employment; HMJH=hybrid multiple job-holding; BO= business ownership; SER= standard employment relationship; SER/HI= standard employment relationship with high income; LQ=low quality; HQ=high quality; WI=within; BW=between; UW=upwards; DW=downward |      |      |      |      |      |      |      |      |      |      |      |      |      |      |      |      |      |      |      |      |      |      |

**Table S6b. Sociodemographic characteristics of men according to trajectories (n=1,467,914)**

|                                  | Constant |        |      |      |      |      |      |      |      | Fluctuating |      |             |             |           | Mobility |                |                |       |             |             | Other | Total |
|----------------------------------|----------|--------|------|------|------|------|------|------|------|-------------|------|-------------|-------------|-----------|----------|----------------|----------------|-------|-------------|-------------|-------|-------|
|                                  | SER      | SER/HI | BO   | HMJH | SSE  | PER  | UE   | HQ   | LQ   | HQ          | LQ   | HQ and HMJH | LQ and HMJH | LQ and HQ | WI HQ    | BW HQ and HMJH | BW LQ and HMJH | WI LQ | UW LQ to HQ | DW HQ to LQ | Other |       |
|                                  | %        | %      | %    | %    | %    | %    | %    | %    | %    | %           | %    | %           | %           |           | %        | %              | %              | %     | %           | %           | %     |       |
| <b>Total</b>                     | 25.07    | 28.97  | 2.91 | 1.66 | 4.45 | 3.75 | 0.17 | 5.59 | 0.89 | 2.74        | 0.11 | 1.26        | 0.66        | 8.49      | 0.19     | 1.54           | 0.70           | 0.03  | 4.44        | 4.53        | 1.86  |       |
| <b>Age (2005)</b>                |          |        |      |      |      |      |      |      |      |             |      |             |             |           |          |                |                |       |             |             |       |       |
| 18 to 24y                        | 4.6      | 0.6    | 0.5  | 3.4  | 0.9  | 19.2 | 3.9  | 4.0  | 10.1 | 3.3         | 11.0 | 2.0         | 6.9         | 8.4       | 3.8      | 3.4            | 6.8            | 9.3   | 11.1        | 7.1         | 6.4   | 4.4   |
| 25 to 34y                        | 21.6     | 17.1   | 13.7 | 17.4 | 11.1 | 36.0 | 22.5 | 27.9 | 29.3 | 23.9        | 27.1 | 21.9        | 25.3        | 31        | 26.0     | 22.8           | 25.2           | 30.1  | 33.1        | 29.3        | 28.8  | 22.4  |
| 35 to 44y                        | 27.9     | 33.8   | 34.0 | 26.3 | 27.5 | 24.4 | 30.6 | 31.4 | 29.8 | 32.8        | 29.4 | 32.2        | 29.9        | 30.2      | 31.9     | 32.1           | 28.7           | 26.6  | 28.1        | 30.9        | 32.0  | 30.5  |
| 45 to 54y                        | 28.2     | 31.0   | 33.1 | 31.2 | 34.7 | 14.9 | 27.1 | 23.1 | 21.4 | 26.5        | 23.2 | 29.0        | 24.3        | 20.6      | 25.1     | 27.4           | 24.6           | 23.8  | 19.0        | 21.4        | 21.9  | 27.1  |
| 55 to 61y                        | 17.7     | 17.4   | 18.7 | 21.7 | 25.8 | 5.6  | 16.0 | 13.6 | 9.4  | 13.6        | 9.3  | 14.9        | 13.6        | 9.8       | 13.2     | 14.3           | 14.7           | 10.3  | 8.7         | 11.2        | 11.0  | 15.6  |
| <b>Country of birth</b>          |          |        |      |      |      |      |      |      |      |             |      |             |             |           |          |                |                |       |             |             |       |       |
| Sweden                           | 89.1     | 93.2   | 93.9 | 94.4 | 88.4 | 90.9 | 81.2 | 91.4 | 82.6 | 90.9        | 77.4 | 94.6        | 89.9        | 89.9      | 91.3     | 93.7           | 91.2           | 83.1  | 90.7        | 90          | 91.2  | 91.0  |
| Within EU-28                     | 7.0      | 4.7    | 4.5  | 3.5  | 6.8  | 4.7  | 8.4  | 5.6  | 8.6  | 6.2         | 11.5 | 3.4         | 6.1         | 5.4       | 6.1      | 3.9            | 4.9            | 7.8   | 5.6         | 6.2         | 4.9   | 5.7   |
| Outside EU-28                    | 3.9      | 2.1    | 1.5  | 2.1  | 4.8  | 4.3  | 10.4 | 3.0  | 8.8  | 2.9         | 11   | 1.9         | 3.9         | 4.6       | 2.6      | 2.4            | 3.9            | 9.1   | 3.7         | 3.8         | 3.9   | 3.4   |
| <b>Level of education (2005)</b> |          |        |      |      |      |      |      |      |      |             |      |             |             |           |          |                |                |       |             |             |       |       |
| Primary/secondary school         | 82.2     | 45.2   | 74.8 | 57.3 | 80.7 | 81.0 | 72.4 | 70.0 | 79.5 | 73.5        | 82.4 | 58.3        | 70.2        | 75.6      | 80.2     | 62.1           | 70.1           | 77.1  | 74.5        | 75.7        | 68.5  | 67.6  |
| Tertiary education <3y           | 9.3      | 21.2   | 13.0 | 15.7 | 10.0 | 9.8  | 12.4 | 13.8 | 10.5 | 14.0        | 9.3  | 15.0        | 14.3        | 11.1      | 10.2     | 15.2           | 13.8           | 10.1  | 11.0        | 11.4        | 13.7  | 14.1  |
| Tertiary education ≥3y           | 8.4      | 33.5   | 12.2 | 27.0 | 9.3  | 9.2  | 15.2 | 16.1 | 9.9  | 12.5        | 8.3  | 26.7        | 15.6        | 13.3      | 9.6      | 22.7           | 16.1           | 12.8  | 14.5        | 12.9        | 17.8  | 18.4  |
|                                  |          |        |      |      |      |      |      |      |      |             |      |             |             |           |          |                |                |       |             |             |       |       |
| <b>Marital status (2005)</b>     |          |        |      |      |      |      |      |      |      |             |      |             |             |           |          |                |                |       |             |             |       |       |
| Couple with children             | 44.9     | 56.1   | 60.6 | 52.7 | 51.8 | 41.4 | 44.6 | 50.7 | 45.5 | 51.7        | 39.2 | 55.3        | 51.4        | 47.1      | 49.7     | 54.6           | 50.4           | 42.9  | 45.9        | 47.7        | 52.8  | 50.3  |
| Couple with no children          | 12.8     | 14.3   | 15.8 | 14.8 | 16.4 | 6.4  | 10.6 | 11.7 | 8.3  | 11.5        | 8.3  | 12.3        | 10.3        | 9.2       | 11.7     | 11.8           | 10.7           | 8.3   | 8.7         | 10.1        | 9.9   | 12.4  |



|                                              |      |      |      |      |      |      |      |      |      |      |      |      |      |      |      |      |      |      |      |      |      |      |
|----------------------------------------------|------|------|------|------|------|------|------|------|------|------|------|------|------|------|------|------|------|------|------|------|------|------|
| Single with children                         | 5.5  | 3.7  | 4.0  | 4.9  | 5.9  | 6.1  | 7.7  | 4.4  | 6.3  | 4.5  | 7.0  | 4.7  | 5.7  | 5    | 4.3  | 4.9  | 5.6  | 4.5  | 5.1  | 5.1  | 5.0  | 4.8  |
| Single                                       | 36.8 | 25.9 | 19.6 | 27.6 | 25.9 | 46.1 | 37.1 | 33.3 | 39.9 | 32.3 | 45.5 | 27.7 | 32.5 | 38.7 | 34.3 | 28.7 | 33.3 | 44.4 | 40.3 | 37.2 | 32.3 | 32.5 |
|                                              |      |      |      |      |      |      |      |      |      |      |      |      |      |      |      |      |      |      |      |      |      |      |
| <b>Age (2009)</b>                            |      |      |      |      |      |      |      |      |      |      |      |      |      |      |      |      |      |      |      |      |      |      |
| 22 to 34y                                    | 15.9 | 7.2  | 5.1  | 12.1 | 5.5  | 42.0 | 15.2 | 18.7 | 26.9 | 15.1 | 26.0 | 12.2 | 20.2 | 25.6 | 16.4 | 14.4 | 20.1 | 27.6 | 30.5 | 22.9 | 21.3 | 15.7 |
| 35 to 44y                                    | 27.0 | 30.8 | 28.9 | 23.8 | 21.4 | 29.0 | 29.8 | 33.0 | 31.0 | 32.6 | 29.6 | 31.2 | 30.3 | 33.2 | 33.5 | 31.5 | 29.6 | 29.1 | 31.7 | 33.4 | 33.9 | 29.8 |
| 45 to 54y                                    | 27.9 | 32.3 | 34.6 | 29.0 | 32.9 | 18.5 | 28.6 | 26.0 | 25.3 | 28.7 | 27.0 | 30.8 | 26.7 | 24.1 | 27.2 | 29.4 | 26.7 | 25.3 | 22.2 | 24.8 | 26.0 | 28.4 |
| 55 to 65y                                    | 29.1 | 29.6 | 31.4 | 35.2 | 40.3 | 10.5 | 26.5 | 22.3 | 16.8 | 23.6 | 17.4 | 25.9 | 22.8 | 17.1 | 22.9 | 24.7 | 23.7 | 18.0 | 15.6 | 18.9 | 18.8 | 26.1 |
|                                              |      |      |      |      |      |      |      |      |      |      |      |      |      |      |      |      |      |      |      |      |      |      |
| <b>Level of education (2009)</b>             |      |      |      |      |      |      |      |      |      |      |      |      |      |      |      |      |      |      |      |      |      |      |
| Primary/secondary school                     | 81.7 | 45.1 | 74.7 | 56.0 | 80.5 | 78.7 | 71.6 | 69.4 | 78.5 | 73.1 | 81.6 | 57.6 | 68.7 | 74.5 | 79.3 | 60.9 | 68.4 | 76.9 | 73.5 | 74.4 | 67.3 | 66.9 |
| Tertiary education <3y                       | 9.5  | 21.2 | 13.0 | 15.5 | 10.0 | 10.2 | 12.6 | 13.8 | 10.9 | 13.9 | 9.4  | 15.2 | 14.5 | 11.3 | 10.4 | 15.4 | 14.3 | 11.1 | 11.2 | 11.7 | 14.0 | 14.2 |
| Tertiary education ≥3y                       | 8.8  | 33.7 | 12.3 | 28.5 | 9.4  | 11.0 | 15.8 | 16.8 | 10.6 | 12.9 | 9.0  | 27.2 | 16.8 | 14.2 | 10.2 | 23.7 | 17.3 | 12.1 | 15.3 | 13.9 | 18.7 | 18.9 |
|                                              |      |      |      |      |      |      |      |      |      |      |      |      |      |      |      |      |      |      |      |      |      |      |
| <b>Marital status (2009)</b>                 |      |      |      |      |      |      |      |      |      |      |      |      |      |      |      |      |      |      |      |      |      |      |
| Couple with children                         | 43.1 | 54.0 | 56.1 | 49.1 | 46.3 | 44.1 | 42.0 | 51.9 | 45.6 | 51.7 | 40.4 | 54.7 | 50.4 | 49.5 | 49.1 | 54.0 | 49.6 | 44.4 | 49.0 | 49.0 | 53.8 | 49.4 |
| Couple with no children                      | 17.2 | 19.7 | 22.1 | 20.9 | 22.5 | 9.2  | 14.1 | 15.7 | 11.2 | 15.6 | 9.6  | 16.9 | 14.0 | 12.3 | 16.4 | 16.3 | 15.1 | 11.5 | 11.7 | 13.4 | 13.4 | 16.9 |
| Single with children                         | 5.3  | 4.0  | 4.4  | 4.7  | 5.9  | 5.0  | 6.9  | 4.4  | 6.3  | 4.8  | 7.4  | 5.1  | 5.4  | 4.8  | 4.5  | 4.8  | 5.5  | 5.8  | 4.6  | 4.9  | 5.0  | 4.8  |
| Single                                       | 34.3 | 22.2 | 17.4 | 25.3 | 25.3 | 41.7 | 36.9 | 27.9 | 36.9 | 27.9 | 42.6 | 23.3 | 30.2 | 33.4 | 30.0 | 24.9 | 29.8 | 38.3 | 34.8 | 32.6 | 27.9 | 28.9 |
|                                              |      |      |      |      |      |      |      |      |      |      |      |      |      |      |      |      |      |      |      |      |      |      |
| <b>Mental disorder diagnosis before 2003</b> |      |      |      |      |      |      |      |      |      |      |      |      |      |      |      |      |      |      |      |      |      |      |
| No                                           | 96.5 | 98.3 | 98.4 | 97.9 | 97.7 | 96.7 | 95.7 | 97.7 | 96.0 | 97.5 | 94.5 | 98   | 97.7 | 97.1 | 97.2 | 97.9 | 97.5 | 96.2 | 96.9 | 97.0 | 97.5 | 97.4 |
| Yes                                          | 3.5  | 1.7  | 1.6  | 2.1  | 2.3  | 3.3  | 4.3  | 2.3  | 4.0  | 2.5  | 5.5  | 2.0  | 2.3  | 2.9  | 2.8  | 2.1  | 2.5  | 3.8  | 3.1  | 3.0  | 2.5  | 2.6  |
|                                              |      |      |      |      |      |      |      |      |      |      |      |      |      |      |      |      |      |      |      |      |      |      |
| <b>Parental mental disorder diagnosis</b>    |      |      |      |      |      |      |      |      |      |      |      |      |      |      |      |      |      |      |      |      |      |      |
| No                                           | 81.0 | 84.7 | 85.6 | 85.3 | 79.7 | 83.9 | 76.4 | 84.1 | 77.0 | 83.4 | 73.7 | 90.8 | 83.8 | 87.5 | 84.4 | 85.7 | 83.9 | 74.9 | 83.9 | 82.8 | 84.1 | 83.2 |
| Yes                                          | 11.7 | 11.0 | 11.0 | 11.3 | 11.8 | 11.6 | 12.2 | 10.7 | 11.8 | 11.0 | 11.5 | 6.1  | 10.6 | 6.4  | 10.5 | 10.6 | 10.5 | 10.8 | 10.7 | 11.2 | 10.8 | 11.2 |

|                                                                                                                                                                                                                                                                                                                      |      |      |      |      |      |      |      |      |      |      |      |      |      |      |      |      |      |      |      |      |      |      |
|----------------------------------------------------------------------------------------------------------------------------------------------------------------------------------------------------------------------------------------------------------------------------------------------------------------------|------|------|------|------|------|------|------|------|------|------|------|------|------|------|------|------|------|------|------|------|------|------|
| Unknown                                                                                                                                                                                                                                                                                                              | 7.3  | 4.3  | 3.4  | 3.4  | 8.5  | 4.5  | 11.4 | 5.2  | 11.2 | 5.6  | 14.7 | 3.1  | 5.7  | 6.1  | 5.1  | 3.8  | 5.6  | 14.3 | 5.4  | 5.9  | 5.1  | 5.7  |
|                                                                                                                                                                                                                                                                                                                      |      |      |      |      |      |      |      |      |      |      |      |      |      |      |      |      |      |      |      |      |      |      |
| <b>Parental socioeconomic position during childhood</b>                                                                                                                                                                                                                                                              |      |      |      |      |      |      |      |      |      |      |      |      |      |      |      |      |      |      |      |      |      |      |
| Manual                                                                                                                                                                                                                                                                                                               | 53.2 | 39.9 | 43.6 | 33.1 | 38.4 | 47.4 | 23.3 | 46.5 | 35.8 | 49.8 | 22.2 | 38.3 | 33.0 | 46.7 | 51.2 | 38.1 | 34.8 | 36.1 | 45.1 | 46.8 | 38.7 | 45.0 |
| Non-manual                                                                                                                                                                                                                                                                                                           | 24.5 | 44.4 | 35.7 | 37.2 | 25.4 | 31.6 | 22.5 | 33.3 | 22.7 | 30.4 | 14.0 | 37.4 | 32.6 | 32.1 | 28.8 | 37.1 | 33.4 | 26.6 | 31.1 | 32.2 | 36.0 | 33.7 |
| Farmers. self-employed                                                                                                                                                                                                                                                                                               | 8.2  | 6.6  | 12.5 | 20.3 | 22.2 | 7.3  | 6.2  | 8.6  | 6.9  | 8.4  | 3.2  | 15.7 | 17.4 | 7.6  | 8.7  | 15.5 | 17.3 | 7.3  | 7.4  | 8.0  | 12.1 | 9.0  |
| Unknown                                                                                                                                                                                                                                                                                                              | 14.1 | 9.1  | 8.1  | 9.3  | 14.1 | 13.7 | 48.0 | 11.5 | 34.6 | 11.5 | 60.7 | 8.6  | 17.0 | 13.6 | 11.3 | 9.3  | 14.6 | 30.1 | 16.4 | 13.0 | 13.2 | 12.3 |
| Note: PER=precarious employment relationship; SSE= solo self-employment; HMJH=hybrid multiple job-holding; BO= business ownership; SER= standard employment relationship; SER/HI= standard employment relationship with high income; LQ=low quality; HQ=high quality; WI=within; BW=between; UW=upwards; DW=downward |      |      |      |      |      |      |      |      |      |      |      |      |      |      |      |      |      |      |      |      |      |      |

**Table S7a. Hazard ratios (crude and adjusted) for common mental disorders for the total population (n= 2,743,764), women (n= 1,275,850) and men (n=1,467,914).**

|              |                                | Common mental disorders |                     |              |      |     |            |              |      |     |            |              |      |
|--------------|--------------------------------|-------------------------|---------------------|--------------|------|-----|------------|--------------|------|-----|------------|--------------|------|
|              |                                | No. of cases            | HR                  | CI95%        |      |     | HR1        | CI95%        |      |     | HR2        | CI95%        |      |
|              |                                | <b>Total</b>            | <b>Constant SER</b> | 40261        | ref  | ref | ref        |              | ref  | ref | ref        |              | ref  |
|              | <b>Constant SER/HI</b>         | 14450                   | 0.63                | 0.62         | 0.64 |     | 0.77       | 0.76         | 0.79 |     | 0.77       | 0.75         | 0.78 |
|              | <b>Constant BO</b>             | 1088                    | 0.62                | 0.58         | 0.66 |     | 0.83       | 0.78         | 0.88 |     | 0.84       | 0.79         | 0.89 |
|              | <b>Constant HMJH</b>           | 1361                    | 0.81                | 0.77         | 0.86 |     | 0.95       | 0.90         | 1.01 |     | 0.97       | 0.92         | 1.02 |
|              | <b>Constant SSE</b>            | 2362                    | 0.76                | 0.73         | 0.79 |     | 0.94       | 0.90         | 0.98 |     | 0.95       | 0.91         | 0.99 |
|              | <b>Constant PE</b>             | 5808                    | 1.47                | 1.43         | 1.51 |     | 1.29       | 1.25         | 1.32 |     | 1.27       | 1.24         | 1.31 |
|              | <b>Constant UE</b>             | 97                      | 1.77                | 1.45         | 2.16 |     | 1.61       | 1.31         | 1.96 |     | 1.42       | 1.16         | 1.74 |
|              | <b>Constant HQ</b>             | 4439                    | 0.87                | 0.84         | 0.89 |     | 0.94       | 0.91         | 0.96 |     | 0.93       | 0.90         | 0.96 |
|              | <b>Constant LQ</b>             | 915                     | 1.42                | 1.33         | 1.52 |     | 1.35       | 1.27         | 1.45 |     | 1.29       | 1.21         | 1.38 |
|              | <b>Fluctuating HQ</b>          | 2079                    | 0.83                | 0.80         | 0.87 |     | 0.91       | 0.88         | 0.96 |     | 0.91       | 0.87         | 0.95 |
|              | <b>Fluctuating LQ</b>          | 134                     | 1.79                | 1.51         | 2.13 |     | 1.63       | 1.38         | 1.93 |     | 1.49       | 1.26         | 1.77 |
|              | <b>Fluctuating HQ and HMJH</b> | 906                     | 0.78                | 0.73         | 0.83 |     | 0.91       | 0.85         | 0.97 |     | 0.92       | 0.86         | 0.98 |
|              | <b>Fluctuating LQ and HMJH</b> | 604                     | 1.14                | 1.05         | 1.23 |     | 1.21       | 1.12         | 1.32 |     | 1.20       | 1.11         | 1.30 |
|              | <b>Fluctuating LQ and HQ</b>   | 9258                    | 1.10                | 1.08         | 1.13 |     | 1.08       | 1.05         | 1.10 |     | 1.07       | 1.05         | 1.10 |
|              | <b>Within HQ</b>               | 206                     | 0.96                | 0.84         | 1.10 |     | 1.05       | 0.92         | 1.21 |     | 1.05       | 0.92         | 1.20 |
|              | <b>Between HQ and HMJH</b>     | 1240                    | 0.85                | 0.80         | 0.90 |     | 0.94       | 0.89         | 1.00 |     | 0.95       | 0.90         | 1.01 |
|              | <b>Between LQ and HMJH</b>     | 653                     | 1.09                | 1.01         | 1.18 |     | 1.16       | 1.07         | 1.25 |     | 1.16       | 1.07         | 1.25 |
|              | <b>Within LQ</b>               | 37                      | 1.71                | 1.24         | 2.37 |     | 1.70       | 1.23         | 2.35 |     | 1.62       | 1.17         | 2.23 |
|              | <b>Upward LQ to HQ</b>         | 5438                    | 1.12                | 1.09         | 1.15 |     | 1.05       | 1.02         | 1.08 |     | 1.04       | 1.01         | 1.07 |
|              | <b>Downward HQ to LQ</b>       | 5030                    | 1.13                | 1.09         | 1.16 |     | 1.11       | 1.07         | 1.14 |     | 1.10       | 1.07         | 1.13 |
|              | <b>Other</b>                   | 1627                    | 1.06                | 1.01         | 1.12 |     | 1.12       | 1.07         | 1.18 |     | 1.12       | 1.06         | 1.17 |
| <b>Women</b> |                                | <b>No. of cases</b>     | <b>HR</b>           | <b>CI95%</b> |      |     | <b>HR1</b> | <b>CI95%</b> |      |     | <b>HR2</b> | <b>CI95%</b> |      |
|              | <b>Constant SER</b>            | 27645                   | ref                 | ref          | ref  |     | ref        | ref          | ref  |     | ref        | ref          | ref  |

|            |                                |                     |           |              |      |  |            |              |      |  |            |              |      |
|------------|--------------------------------|---------------------|-----------|--------------|------|--|------------|--------------|------|--|------------|--------------|------|
|            | <b>Constant SER/HI</b>         | 5446                | 0.80      | 0.77         | 0.82 |  | 0.84       | 0.81         | 0.86 |  | 0.83       | 0.80         | 0.85 |
|            | <b>Constant BO</b>             | 282                 | 0.78      | 0.70         | 0.88 |  | 0.86       | 0.76         | 0.97 |  | 0.86       | 0.76         | 0.97 |
|            | <b>Constant HMJH</b>           | 803                 | 1.05      | 0.98         | 1.12 |  | 1.08       | 1.01         | 1.16 |  | 1.08       | 1.01         | 1.16 |
|            | <b>Constant SSE</b>            | 879                 | 0.95      | 0.89         | 1.02 |  | 1.00       | 0.93         | 1.07 |  | 0.99       | 0.92         | 1.06 |
|            | <b>Constant PE</b>             | 3438                | 1.73      | 1.66         | 1.79 |  | 1.32       | 1.27         | 1.36 |  | 1.30       | 1.25         | 1.35 |
|            | <b>Constant UE</b>             | 69                  | 1.79      | 1.42         | 2.27 |  | 1.47       | 1.16         | 1.86 |  | 1.35       | 1.06         | 1.71 |
|            | <b>Constant HQ</b>             | 2124                | 1.01      | 0.96         | 1.05 |  | 0.96       | 0.92         | 1.01 |  | 0.96       | 0.91         | 1.00 |
|            | <b>Constant LQ</b>             | 518                 | 1.66      | 1.52         | 1.81 |  | 1.36       | 1.25         | 1.49 |  | 1.30       | 1.19         | 1.42 |
|            | <b>Fluctuating HQ</b>          | 967                 | 1.00      | 0.94         | 1.07 |  | 0.96       | 0.90         | 1.03 |  | 0.95       | 0.89         | 1.02 |
|            | <b>Fluctuating LQ</b>          | 64                  | 1.92      | 1.51         | 2.46 |  | 1.50       | 1.18         | 1.92 |  | 1.38       | 1.08         | 1.77 |
|            | <b>Fluctuating HQ and HMJH</b> | 438                 | 0.96      | 0.88         | 1.06 |  | 1.00       | 0.91         | 1.10 |  | 1.01       | 0.92         | 1.11 |
|            | <b>Fluctuating LQ and HMJH</b> | 264                 | 1.40      | 1.24         | 1.59 |  | 1.25       | 1.10         | 1.41 |  | 1.22       | 1.08         | 1.38 |
|            | <b>Fluctuating LQ and HQ</b>   | 5038                | 1.29      | 1.25         | 1.33 |  | 1.11       | 1.08         | 1.14 |  | 1.10       | 1.07         | 1.13 |
|            | <b>Within HQ</b>               | 92                  | 1.18      | 0.96         | 1.44 |  | 1.11       | 0.91         | 1.37 |  | 1.11       | 0.90         | 1.36 |
|            | <b>Between HQ and HMJH</b>     | 671                 | 1.05      | 0.98         | 1.14 |  | 1.06       | 0.98         | 1.14 |  | 1.06       | 0.98         | 1.14 |
|            | <b>Between LQ and HMJH</b>     | 334                 | 1.44      | 1.30         | 1.61 |  | 1.31       | 1.18         | 1.46 |  | 1.29       | 1.16         | 1.44 |
|            | <b>Within LQ</b>               | 13                  | 1.85      | 1.07         | 3.18 |  | 1.52       | 0.88         | 2.61 |  | 1.40       | 0.81         | 2.41 |
|            | <b>Upward LQ to HQ</b>         | 3166                | 1.26      | 1.22         | 1.31 |  | 1.07       | 1.03         | 1.11 |  | 1.06       | 1.02         | 1.10 |
|            | <b>Downward HQ to LQ</b>       | 2796                | 1.33      | 1.28         | 1.38 |  | 1.16       | 1.11         | 1.20 |  | 1.14       | 1.10         | 1.19 |
|            | <b>Other</b>                   | 726                 | 1.37      | 1.27         | 1.47 |  | 1.21       | 1.13         | 1.31 |  | 1.20       | 1.12         | 1.30 |
| <b>Men</b> |                                | <b>No. of cases</b> | <b>HR</b> | <b>CI95%</b> |      |  | <b>HR1</b> | <b>CI95%</b> |      |  | <b>HR2</b> | <b>CI95%</b> |      |
|            | <b>Constant SER</b>            | 12100               | ref       | ref          | ref  |  | ref        | ref          | ref  |  | ref        | ref          | ref  |
|            | <b>Constant SER/HI</b>         | 8831                | 0.63      | 0.61         | 0.64 |  | 0.68       | 0.66         | 0.70 |  | 0.68       | 0.66         | 0.70 |
|            | <b>Constant BO</b>             | 962                 | 0.68      | 0.64         | 0.73 |  | 0.76       | 0.71         | 0.81 |  | 0.77       | 0.72         | 0.82 |
|            | <b>Constant HMJH</b>           | 642                 | 0.80      | 0.74         | 0.86 |  | 0.86       | 0.80         | 0.94 |  | 0.88       | 0.81         | 0.95 |
|            | <b>Constant SSE</b>            | 1672                | 0.78      | 0.74         | 0.82 |  | 0.85       | 0.81         | 0.90 |  | 0.87       | 0.82         | 0.91 |
|            | <b>Constant PE</b>             | 2389                | 1.32      | 1.27         | 1.38 |  | 1.19       | 1.14         | 1.24 |  | 1.18       | 1.13         | 1.23 |
|            | <b>Constant UE</b>             | 121                 | 1.49      | 1.25         | 1.78 |  | 1.42       | 1.19         | 1.70 |  | 1.34       | 1.12         | 1.61 |
|            | <b>Constant HQ</b>             | 2318                | 0.86      | 0.82         | 0.89 |  | 0.87       | 0.83         | 0.91 |  | 0.87       | 0.83         | 0.91 |

|                                |      |      |      |      |  |      |      |      |  |      |      |      |
|--------------------------------|------|------|------|------|--|------|------|------|--|------|------|------|
| <b>Constant LQ</b>             | 599  | 1.40 | 1.29 | 1.52 |  | 1.28 | 1.18 | 1.39 |  | 1.24 | 1.14 | 1.35 |
| <b>Fluctuating HQ</b>          | 1079 | 0.81 | 0.76 | 0.87 |  | 0.83 | 0.78 | 0.89 |  | 0.83 | 0.78 | 0.89 |
| <b>Fluctuating LQ</b>          | 86   | 1.72 | 1.39 | 2.12 |  | 1.46 | 1.18 | 1.81 |  | 1.37 | 1.10 | 1.70 |
| <b>Fluctuating HQ and HMJH</b> | 455  | 0.75 | 0.68 | 0.82 |  | 0.79 | 0.72 | 0.87 |  | 0.80 | 0.73 | 0.88 |
| <b>Fluctuating LQ and HMJH</b> | 335  | 1.04 | 0.93 | 1.16 |  | 1.04 | 0.94 | 1.16 |  | 1.05 | 0.94 | 1.17 |
| <b>Fluctuating LQ and HQ</b>   | 4222 | 1.02 | 0.99 | 1.06 |  | 0.98 | 0.95 | 1.02 |  | 0.98 | 0.95 | 1.01 |
| <b>Within HQ</b>               | 93   | 1.02 | 0.83 | 1.25 |  | 1.02 | 0.83 | 1.25 |  | 1.03 | 0.84 | 1.26 |
| <b>Between HQ and HMJH</b>     | 588  | 0.78 | 0.72 | 0.85 |  | 0.82 | 0.75 | 0.89 |  | 0.83 | 0.76 | 0.90 |
| <b>Between LQ and HMJH</b>     | 337  | 1.00 | 0.89 | 1.11 |  | 1.00 | 0.89 | 1.11 |  | 1.01 | 0.90 | 1.12 |
| <b>Within LQ</b>               | 25   | 1.94 | 1.31 | 2.87 |  | 1.79 | 1.21 | 2.65 |  | 1.74 | 1.17 | 2.57 |
| <b>Upward LQ to HQ</b>         | 2218 | 1.03 | 0.99 | 1.08 |  | 0.97 | 0.93 | 1.02 |  | 0.97 | 0.92 | 1.01 |
| <b>Downward HQ to LQ</b>       | 2237 | 1.02 | 0.98 | 1.07 |  | 0.99 | 0.95 | 1.04 |  | 0.99 | 0.94 | 1.03 |
| <b>Other</b>                   | 911  | 1.01 | 0.95 | 1.08 |  | 1.00 | 0.94 | 1.07 |  | 1.01 | 0.94 | 1.08 |

Note 1: HR: not adjusted. HR1: adjusted for sex, age in 2005, level of education in 2005, marital status in 2005, country of birth, any mental disorder diagnosis before 2003. HR2: adjusted for adjusted for sex, age in 2005, level of education in 2005, marital status in 2005, country of birth, any mental disorder diagnosis before 2003, parental mental disorder diagnosis, and parental socioeconomic position during childhood.

Note 2: PER=precarious employment relationship; SSE= solo self-employment; HMJH=hybrid multiple job-holding; BO= business ownership; SER= standard employment relationship; SER/HI= standard employment relationship - high income; LQ=low quality; HQ=high quality

**Table S7b. Hazard ratios (crude and adjusted) for substance use disorders for the total population (n= 2,743,764), women (n= 1,275,850) and men (n=1,467,914).**

|                                |                     | Substance use disorders |       |       |     |      |      |       |     |      |      |       |     |
|--------------------------------|---------------------|-------------------------|-------|-------|-----|------|------|-------|-----|------|------|-------|-----|
|                                |                     | No. of cases            | HR    | CI95% |     |      | HR1  | CI95% |     |      | HR2  | CI95% |     |
|                                |                     | <b>Constant SER</b>     | 12370 | ref   | ref | ref  |      | ref   | ref | ref  |      | ref   | ref |
| <b>Constant SER/HI</b>         | 5942                | 0.84                    | 0.82  | 0.87  |     | 0.81 | 0.79 | 0.84  |     | 0.80 | 0.78 | 0.83  |     |
| <b>Constant BO</b>             | 605                 | 1.13                    | 1.04  | 1.22  |     | 0.92 | 0.85 | 1.00  |     | 0.93 | 0.86 | 1.01  |     |
| <b>Constant HMJH</b>           | 448                 | 0.88                    | 0.80  | 0.96  |     | 0.81 | 0.73 | 0.89  |     | 0.84 | 0.77 | 0.93  |     |
| <b>Constant SSE</b>            | 1133                | 1.20                    | 1.13  | 1.27  |     | 0.94 | 0.88 | 1.00  |     | 0.98 | 0.92 | 1.04  |     |
| <b>Constant PE</b>             | 1705                | 1.40                    | 1.33  | 1.47  |     | 1.30 | 1.23 | 1.37  |     | 1.28 | 1.21 | 1.34  |     |
| <b>Constant UE</b>             | 60                  | 3.56                    | 2.75  | 4.59  |     | 2.45 | 1.90 | 3.16  |     | 2.19 | 1.69 | 2.83  |     |
| <b>Constant HQ</b>             | 1549                | 0.99                    | 0.94  | 1.04  |     | 0.92 | 0.87 | 0.97  |     | 0.92 | 0.87 | 0.97  |     |
| <b>Constant LQ</b>             | 394                 | 1.99                    | 1.80  | 2.20  |     | 1.63 | 1.47 | 1.80  |     | 1.56 | 1.41 | 1.72  |     |
| <b>Fluctuating HQ</b>          | 829                 | 1.09                    | 1.01  | 1.17  |     | 0.97 | 0.91 | 1.04  |     | 0.97 | 0.90 | 1.04  |     |
| <b>Fluctuating LQ</b>          | 65                  | 2.82                    | 2.21  | 3.60  |     | 2.07 | 1.62 | 2.64  |     | 1.90 | 1.49 | 2.43  |     |
| <b>Fluctuating HQ and HMJH</b> | 296                 | 0.84                    | 0.74  | 0.94  |     | 0.77 | 0.69 | 0.87  |     | 0.79 | 0.71 | 0.89  |     |
| <b>Fluctuating LQ and HMJH</b> | 213                 | 1.28                    | 1.12  | 1.47  |     | 1.13 | 0.99 | 1.30  |     | 1.15 | 1.00 | 1.32  |     |
| <b>Fluctuating LQ and HQ</b>   | 2948                | 1.15                    | 1.10  | 1.19  |     | 1.06 | 1.01 | 1.10  |     | 1.05 | 1.01 | 1.09  |     |
| <b>Within HQ</b>               | 80                  | 1.22                    | 0.98  | 1.51  |     | 1.05 | 0.84 | 1.31  |     | 1.05 | 0.84 | 1.31  |     |
| <b>Between HQ and HMJH</b>     | 357                 | 0.80                    | 0.72  | 0.89  |     | 0.76 | 0.68 | 0.85  |     | 0.78 | 0.70 | 0.87  |     |
| <b>Between LQ and HMJH</b>     | 196                 | 1.06                    | 0.92  | 1.22  |     | 0.95 | 0.82 | 1.09  |     | 0.97 | 0.84 | 1.12  |     |
| <b>Within LQ</b>               | 14                  | 2.10                    | 1.24  | 3.54  |     | 1.67 | 0.99 | 2.82  |     | 1.63 | 0.96 | 2.75  |     |
| <b>Upward LQ to HQ</b>         | 1660                | 1.11                    | 1.05  | 1.17  |     | 1.06 | 1.01 | 1.12  |     | 1.05 | 0.99 | 1.10  |     |
| <b>Downward HQ to LQ</b>       | 1792                | 1.30                    | 1.24  | 1.37  |     | 1.19 | 1.14 | 1.26  |     | 1.18 | 1.12 | 1.24  |     |
| <b>Other</b>                   | 501                 | 1.06                    | 0.97  | 1.16  |     | 0.96 | 0.88 | 1.05  |     | 0.96 | 0.88 | 1.05  |     |
|                                |                     | No. of cases            | HR    | CI95% |     |      | HR1  | CI95% |     |      | HR2  | CI95% |     |
|                                | <b>Constant SER</b> | 5245                    | ref   | ref   | ref |      | ref  | ref   | ref |      | ref  | ref   | ref |

|              |                                |                     |           |              |      |  |            |              |      |  |            |              |      |
|--------------|--------------------------------|---------------------|-----------|--------------|------|--|------------|--------------|------|--|------------|--------------|------|
| <b>Women</b> | <b>Constant SER/HI</b>         | 993                 | 0.77      | 0.72         | 0.82 |  | 0.95       | 0.89         | 1.02 |  | 0.94       | 0.87         | 1.00 |
|              | <b>Constant BO</b>             | 80                  | 1.18      | 0.94         | 1.47 |  | 1.26       | 1.01         | 1.57 |  | 1.27       | 1.01         | 1.58 |
|              | <b>Constant HMJH</b>           | 136                 | 0.93      | 0.79         | 1.11 |  | 1.02       | 0.86         | 1.21 |  | 1.04       | 0.88         | 1.23 |
|              | <b>Constant SSE</b>            | 214                 | 1.23      | 1.07         | 1.41 |  | 1.19       | 1.04         | 1.37 |  | 1.19       | 1.04         | 1.37 |
|              | <b>Constant PE</b>             | 521                 | 1.36      | 1.24         | 1.49 |  | 1.29       | 1.17         | 1.41 |  | 1.27       | 1.16         | 1.40 |
|              | <b>Constant UE</b>             | 8                   | 1.08      | 0.54         | 2.17 |  | 0.99       | 0.49         | 1.97 |  | 0.94       | 0.47         | 1.89 |
|              | <b>Constant HQ</b>             | 377                 | 0.94      | 0.85         | 1.05 |  | 1.07       | 0.97         | 1.19 |  | 1.06       | 0.96         | 1.18 |
|              | <b>Constant LQ</b>             | 109                 | 1.82      | 1.50         | 2.20 |  | 1.65       | 1.37         | 2.00 |  | 1.60       | 1.32         | 1.94 |
|              | <b>Fluctuating HQ</b>          | 174                 | 0.95      | 0.82         | 1.11 |  | 1.07       | 0.92         | 1.25 |  | 1.06       | 0.91         | 1.23 |
|              | <b>Fluctuating LQ</b>          | 15                  | 2.34      | 1.41         | 3.88 |  | 1.96       | 1.18         | 3.26 |  | 1.87       | 1.13         | 3.11 |
|              | <b>Fluctuating HQ and HMJH</b> | 75                  | 0.87      | 0.69         | 1.09 |  | 0.99       | 0.79         | 1.25 |  | 1.01       | 0.80         | 1.27 |
|              | <b>Fluctuating LQ and HMJH</b> | 45                  | 1.21      | 0.89         | 1.63 |  | 1.20       | 0.89         | 1.62 |  | 1.19       | 0.88         | 1.61 |
|              | <b>Fluctuating LQ and HQ</b>   | 806                 | 1.08      | 1.01         | 1.16 |  | 1.06       | 0.99         | 1.15 |  | 1.05       | 0.98         | 1.14 |
|              | <b>Within HQ</b>               | 18                  | 1.21      | 0.76         | 1.92 |  | 1.26       | 0.80         | 2.01 |  | 1.26       | 0.79         | 2.00 |
|              | <b>Between HQ and HMJH</b>     | 94                  | 0.78      | 0.64         | 0.96 |  | 0.87       | 0.71         | 1.06 |  | 0.88       | 0.72         | 1.08 |
|              | <b>Between LQ and HMJH</b>     | 49                  | 1.09      | 0.82         | 1.44 |  | 1.10       | 0.83         | 1.47 |  | 1.10       | 0.83         | 1.46 |
|              | <b>Within LQ</b>               | 2                   | 1.48      | 0.37         | 5.93 |  | 1.33       | 0.33         | 5.30 |  | 1.27       | 0.32         | 5.08 |
|              | <b>Upward LQ to HQ</b>         | 540                 | 1.13      | 1.03         | 1.23 |  | 1.12       | 1.03         | 1.23 |  | 1.11       | 1.01         | 1.21 |
|              | <b>Downward HQ to LQ</b>       | 524                 | 1.30      | 1.19         | 1.43 |  | 1.28       | 1.17         | 1.41 |  | 1.27       | 1.16         | 1.39 |
|              | <b>Other</b>                   | 103                 | 1.01      | 0.83         | 1.23 |  | 1.03       | 0.85         | 1.26 |  | 1.03       | 0.84         | 1.25 |
| <b>Men</b>   |                                | <b>No. of cases</b> | <b>HR</b> | <b>CI95%</b> |      |  | <b>HR1</b> | <b>CI95%</b> |      |  | <b>HR2</b> | <b>CI95%</b> |      |
|              | <b>Constant SER</b>            | 6902                | ref       | ref          | ref  |  | ref        | ref          | ref  |  | ref        | ref          | ref  |
|              | <b>Constant SER/HI</b>         | 4886                | 0.61      | 0.59         | 0.63 |  | 0.77       | 0.74         | 0.80 |  | 0.76       | 0.73         | 0.79 |
|              | <b>Constant BO</b>             | 620                 | 0.77      | 0.71         | 0.83 |  | 0.89       | 0.82         | 0.97 |  | 0.90       | 0.83         | 0.98 |
|              | <b>Constant HMJH</b>           | 303                 | 0.66      | 0.59         | 0.74 |  | 0.78       | 0.70         | 0.88 |  | 0.81       | 0.72         | 0.91 |
|              | <b>Constant SSE</b>            | 1013                | 0.83      | 0.78         | 0.88 |  | 0.85       | 0.80         | 0.91 |  | 0.90       | 0.84         | 0.96 |
|              | <b>Constant PE</b>             | 1189                | 1.15      | 1.08         | 1.22 |  | 1.29       | 1.21         | 1.37 |  | 1.26       | 1.18         | 1.34 |
|              | <b>Constant UE</b>             | 97                  | 2.10      | 1.72         | 2.57 |  | 2.15       | 1.75         | 2.63 |  | 1.99       | 1.63         | 2.44 |
|              | <b>Constant HQ</b>             | 1176                | 0.76      | 0.72         | 0.81 |  | 0.88       | 0.82         | 0.93 |  | 0.88       | 0.82         | 0.93 |

|                                |      |      |      |      |  |      |      |      |  |      |      |      |
|--------------------------------|------|------|------|------|--|------|------|------|--|------|------|------|
| <b>Constant LQ</b>             | 362  | 1.49 | 1.34 | 1.65 |  | 1.59 | 1.43 | 1.77 |  | 1.52 | 1.37 | 1.70 |
| <b>Fluctuating HQ</b>          | 638  | 0.85 | 0.78 | 0.92 |  | 0.94 | 0.87 | 1.02 |  | 0.94 | 0.87 | 1.02 |
| <b>Fluctuating LQ</b>          | 52   | 1.82 | 1.38 | 2.38 |  | 1.79 | 1.36 | 2.35 |  | 1.64 | 1.25 | 2.16 |
| <b>Fluctuating HQ and HMJH</b> | 206  | 0.59 | 0.52 | 0.68 |  | 0.71 | 0.63 | 0.82 |  | 0.73 | 0.64 | 0.84 |
| <b>Fluctuating LQ and HMJH</b> | 168  | 0.90 | 0.77 | 1.05 |  | 1.05 | 0.90 | 1.22 |  | 1.07 | 0.91 | 1.25 |
| <b>Fluctuating LQ and HQ</b>   | 2155 | 0.91 | 0.87 | 0.96 |  | 1.02 | 0.98 | 1.08 |  | 1.02 | 0.97 | 1.07 |
| <b>Within HQ</b>               | 52   | 1.00 | 0.76 | 1.31 |  | 1.08 | 0.82 | 1.42 |  | 1.09 | 0.83 | 1.43 |
| <b>Between HQ and HMJH</b>     | 266  | 0.63 | 0.55 | 0.71 |  | 0.75 | 0.66 | 0.85 |  | 0.77 | 0.68 | 0.87 |
| <b>Between LQ and HMJH</b>     | 157  | 0.81 | 0.69 | 0.95 |  | 0.93 | 0.79 | 1.09 |  | 0.95 | 0.81 | 1.12 |
| <b>Within LQ</b>               | 12   | 1.62 | 0.92 | 2.85 |  | 1.71 | 0.97 | 3.02 |  | 1.69 | 0.96 | 2.98 |
| <b>Upward LQ to HQ</b>         | 1102 | 0.90 | 0.84 | 0.96 |  | 1.01 | 0.95 | 1.08 |  | 1.00 | 0.94 | 1.07 |
| <b>Downward HQ to LQ</b>       | 1291 | 1.03 | 0.97 | 1.09 |  | 1.14 | 1.07 | 1.21 |  | 1.13 | 1.07 | 1.20 |
| <b>Other</b>                   | 382  | 0.74 | 0.67 | 0.82 |  | 0.88 | 0.79 | 0.98 |  | 0.88 | 0.80 | 0.98 |

Note 1: HR: not adjusted. HR1: adjusted for sex, age in 2005, level of education in 2005, marital status in 2005, country of birth, any mental disorder diagnosis before 2003. HR2: adjusted for adjusted for sex, age in 2005, level of education in 2005, marital status in 2005, country of birth, any mental disorder diagnosis before 2003, parental mental disorder diagnosis, and parental socioeconomic position during childhood.

Note 2: PER=precarious employment relationship; SSE= solo self-employment; HMJH=hybrid multiple job-holding; BO= business ownership; SER= standard employment relationship; SER/HI= standard employment relationship - high income; LQ=low quality; HQ=high quality



**Table S7c. Hazard ratios (crude and adjusted) for suicide attempt for the total population (n= 2,743,764), women (n= 1,275,850) and men (n=1,467,914).**

|                                |                        | Suicide attempt     |      |       |      |      |      |       |      |      |      |       |      |
|--------------------------------|------------------------|---------------------|------|-------|------|------|------|-------|------|------|------|-------|------|
|                                |                        | No. of cases        | HR   | CI95% |      |      | HR1  | CI95% |      |      | HR2  | CI95% |      |
|                                |                        | <b>Constant SER</b> | 6350 | ref   | ref  | ref  |      | ref   | ref  | ref  |      | ref   | ref  |
| <b>Constant SER/HI</b>         | 2864                   | 0.79                | 0.76 | 0.83  |      | 0.85 | 0.81 | 0.90  |      | 0.86 | 0.82 | 0.90  |      |
| <b>Constant BO</b>             | 267                    | 0.97                | 0.86 | 1.10  |      | 0.94 | 0.83 | 1.06  |      | 0.95 | 0.84 | 1.07  |      |
| <b>Constant HMJH</b>           | 255                    | 0.97                | 0.86 | 1.10  |      | 0.98 | 0.87 | 1.12  |      | 0.99 | 0.87 | 1.12  |      |
| <b>Constant SSE</b>            | 474                    | 0.97                | 0.89 | 1.07  |      | 0.95 | 0.86 | 1.04  |      | 0.95 | 0.86 | 1.04  |      |
| <b>Constant PE</b>             | 902                    | 1.44                | 1.34 | 1.54  |      | 1.22 | 1.14 | 1.32  |      | 1.22 | 1.14 | 1.31  |      |
| <b>Constant UE</b>             | 20                     | 2.31                | 1.49 | 3.59  |      | 1.94 | 1.25 | 3.01  |      | 1.76 | 1.13 | 2.73  |      |
| <b>Constant HQ</b>             | 829                    | 1.03                | 0.96 | 1.11  |      | 1.01 | 0.94 | 1.09  |      | 1.01 | 0.94 | 1.09  |      |
| <b>Constant LQ</b>             | 160                    | 1.57                | 1.34 | 1.84  |      | 1.34 | 1.15 | 1.57  |      | 1.30 | 1.11 | 1.52  |      |
| <b>Fluctuating HQ</b>          | 387                    | 0.99                | 0.89 | 1.09  |      | 0.96 | 0.87 | 1.06  |      | 0.96 | 0.87 | 1.07  |      |
| <b>Fluctuating LQ</b>          | 19                     | 1.59                | 1.01 | 2.50  |      | 1.30 | 0.83 | 2.04  |      | 1.21 | 0.77 | 1.90  |      |
| <b>Fluctuating HQ and HMJH</b> | 198                    | 1.09                | 0.95 | 1.26  |      | 1.10 | 0.95 | 1.26  |      | 1.01 | 0.96 | 1.27  |      |
| <b>Fluctuating LQ and HMJH</b> | 109                    | 1.31                | 1.08 | 1.58  |      | 1.22 | 1.01 | 1.47  |      | 1.21 | 1.00 | 1.47  |      |
| <b>Fluctuating LQ and HQ</b>   | 1454                   | 1.10                | 1.04 | 1.16  |      | 1.01 | 0.95 | 1.26  |      | 1.01 | 0.95 | 1.07  |      |
| <b>Within HQ</b>               | 35                     | 1.03                | 0.74 | 1.44  |      | 0.98 | 0.70 | 1.36  |      | 0.98 | 0.70 | 1.37  |      |
| <b>Between HQ and HMJH</b>     | 228                    | 0.99                | 0.87 | 1.13  |      | 0.98 | 0.86 | 1.12  |      | 0.99 | 0.87 | 1.13  |      |
| <b>Between LQ and HMJH</b>     | 93                     | 0.97                | 0.79 | 1.20  |      | 0.90 | 0.74 | 1.11  |      | 0.90 | 0.74 | 1.11  |      |
| <b>Within LQ</b>               | 5                      | 1.44                | 0.60 | 3.47  |      | 1.25 | 0.52 | 3.00  |      | 1.22 | 0.51 | 2.94  |      |
| <b>Upward LQ to HQ</b>         | 826                    | 1.08                | 1.00 | 1.16  |      | 0.99 | 0.92 | 1.06  |      | 0.98 | 0.91 | 1.05  |      |
| <b>Downward HQ to LQ</b>       | 833                    | 1.18                | 1.10 | 1.27  |      | 1.08 | 1.01 | 1.17  |      | 1.08 | 1.01 | 1.17  |      |
| <b>Other</b>                   | 264                    | 1.09                | 0.97 | 1.24  |      | 1.01 | 0.90 | 1.15  |      | 1.01 | 0.90 | 1.15  |      |
|                                |                        | No. of cases        | HR   | CI95% |      |      | HR1  | CI95% |      |      | HR2  | CI95% |      |
|                                | <b>Constant SER</b>    | 3659                | ref  | ref   | ref  |      | ref  | ref   | ref  |      | ref  | ref   | ref  |
|                                | <b>Constant SER/HI</b> | 708                 | 0.79 | 0.72  | 0.85 |      | 0.90 | 0.82  | 0.97 |      | 0.90 | 0.82  | 0.98 |

|              |                                |                     |           |              |      |  |            |              |      |  |            |              |      |
|--------------|--------------------------------|---------------------|-----------|--------------|------|--|------------|--------------|------|--|------------|--------------|------|
| <b>Women</b> | <b>Constant BO</b>             | 43                  | 0.91      | 0.67         | 1.22 |  | 0.95       | 0.70         | 1.28 |  | 0.96       | 0.71         | 1.29 |
|              | <b>Constant HMJH</b>           | 93                  | 0.92      | 0.75         | 1.12 |  | 0.96       | 0.78         | 1.18 |  | 0.97       | 0.79         | 1.19 |
|              | <b>Constant SSE</b>            | 120                 | 0.98      | 0.82         | 1.18 |  | 0.99       | 0.83         | 1.19 |  | 0.99       | 0.83         | 1.19 |
|              | <b>Constant PE</b>             | 345                 | 1.29      | 1.16         | 1.44 |  | 1.15       | 1.03         | 1.29 |  | 1.14       | 1.02         | 1.28 |
|              | <b>Constant UE</b>             | 5                   | 0.97      | 0.40         | 2.33 |  | 0.87       | 0.36         | 2.08 |  | 0.80       | 0.33         | 1.92 |
|              | <b>Constant HQ</b>             | 263                 | 0.94      | 0.83         | 1.07 |  | 0.99       | 0.87         | 1.12 |  | 0.99       | 0.87         | 1.12 |
|              | <b>Constant LQ</b>             | 50                  | 1.20      | 0.91         | 1.59 |  | 1.07       | 0.81         | 1.42 |  | 1.02       | 0.77         | 1.35 |
|              | <b>Fluctuating HQ</b>          | 128                 | 1.00      | 0.83         | 1.19 |  | 1.05       | 0.88         | 1.25 |  | 1.05       | 0.88         | 1.25 |
|              | <b>Fluctuating LQ</b>          | 6                   | 1.33      | 0.60         | 2.97 |  | 1.14       | 0.51         | 2.54 |  | 1.04       | 0.47         | 2.33 |
|              | <b>Fluctuating HQ and HMJH</b> | 61                  | 1.02      | 0.79         | 1.31 |  | 1.08       | 0.84         | 1.40 |  | 1.09       | 0.84         | 1.40 |
|              | <b>Fluctuating LQ and HMJH</b> | 32                  | 1.29      | 0.91         | 1.82 |  | 1.23       | 0.87         | 1.74 |  | 1.21       | 0.85         | 1.72 |
|              | <b>Fluctuating LQ and HQ</b>   | 562                 | 1.01      | 0.98         | 1.17 |  | 1.02       | 0.93         | 1.11 |  | 1.02       | 0.93         | 1.11 |
|              | <b>Within HQ</b>               | 12                  | 1.16      | 0.66         | 2.04 |  | 1.17       | 0.67         | 2.07 |  | 1.17       | 0.67         | 2.07 |
|              | <b>Between HQ and HMJH</b>     | 85                  | 1.01      | 0.82         | 1.26 |  | 1.06       | 0.85         | 1.31 |  | 1.06       | 0.86         | 1.32 |
|              | <b>Between LQ and HMJH</b>     | 31                  | 1.00      | 0.70         | 1.43 |  | 0.98       | 0.69         | 1.39 |  | 0.97       | 0.68         | 1.38 |
|              | <b>Within LQ</b>               | 2                   | 2.12      | 0.53         | 8.48 |  | 1.84       | 0.46         | 7.37 |  | 1.73       | 0.43         | 6.93 |
|              | <b>Upward LQ to HQ</b>         | 326                 | 0.98      | 0.87         | 1.10 |  | 0.93       | 0.83         | 1.04 |  | 0.92       | 0.82         | 1.03 |
|              | <b>Downward HQ to LQ</b>       | 355                 | 1.27      | 1.14         | 1.42 |  | 1.20       | 1.07         | 1.33 |  | 1.19       | 1.07         | 1.33 |
|              | <b>Other</b>                   | 72                  | 1.02      | 0.81         | 1.29 |  | 0.99       | 0.78         | 1.25 |  | 0.98       | 0.78         | 1.24 |
| <b>Men</b>   |                                | <b>No. of cases</b> | <b>HR</b> | <b>CI95%</b> |      |  | <b>HR1</b> | <b>CI95%</b> |      |  | <b>HR2</b> | <b>CI95%</b> |      |
|              | <b>Constant SER</b>            | 2606                | ref       | ref          | ref  |  | ref        | ref          | ref  |  | ref        | ref          | ref  |
|              | <b>Constant SER/HI</b>         | 2124                | 0.70      | 0.66         | 0.74 |  | 0.84       | 0.79         | 0.89 |  | 0.85       | 0.80         | 0.90 |
|              | <b>Constant BO</b>             | 257                 | 0.85      | 0.75         | 0.96 |  | 0.92       | 0.81         | 1.05 |  | 0.93       | 0.82         | 1.06 |
|              | <b>Constant HMJH</b>           | 143                 | 0.83      | 0.70         | 0.98 |  | 0.95       | 0.80         | 1.12 |  | 0.95       | 0.81         | 1.13 |
|              | <b>Constant SSE</b>            | 410                 | 0.89      | 0.80         | 0.98 |  | 0.96       | 0.87         | 1.07 |  | 0.97       | 0.87         | 1.07 |
|              | <b>Constant PE</b>             | 562                 | 1.43      | 1.31         | 1.57 |  | 1.29       | 1.17         | 1.41 |  | 1.28       | 1.17         | 1.41 |
|              | <b>Constant UE</b>             | 23                  | 1.32      | 0.87         | 1.99 |  | 1.34       | 0.89         | 2.01 |  | 1.30       | 0.86         | 1.95 |
|              | <b>Constant HQ</b>             | 561                 | 0.97      | 0.88         | 1.06 |  | 1.00       | 0.91         | 1.09 |  | 1.00       | 0.91         | 1.10 |
|              | <b>Constant LQ</b>             | 144                 | 1.56      | 1.32         | 1.85 |  | 1.47       | 1.24         | 1.74 |  | 1.45       | 1.22         | 1.71 |

|                                |     |      |      |      |  |      |      |      |  |      |      |      |
|--------------------------------|-----|------|------|------|--|------|------|------|--|------|------|------|
| <b>Fluctuating HQ</b>          | 256 | 0.90 | 0.79 | 1.02 |  | 0.93 | 0.82 | 1.06 |  | 0.93 | 0.82 | 1.06 |
| <b>Fluctuating LQ</b>          | 17  | 1.56 | 0.97 | 2.52 |  | 1.43 | 0.89 | 2.31 |  | 1.37 | 0.85 | 2.22 |
| <b>Fluctuating HQ and HMJH</b> | 123 | 0.94 | 0.78 | 1.12 |  | 1.05 | 0.87 | 1.25 |  | 1.05 | 0.87 | 1.26 |
| <b>Fluctuating LQ and HMJH</b> | 81  | 1.17 | 0.94 | 1.47 |  | 1.21 | 0.97 | 1.51 |  | 1.21 | 0.97 | 1.51 |
| <b>Fluctuating LQ and HQ</b>   | 900 | 1.01 | 0.78 | 1.12 |  | 0.99 | 0.92 | 1.07 |  | 0.99 | 0.92 | 1.07 |
| <b>Within HQ</b>               | 18  | 0.92 | 0.58 | 1.45 |  | 0.91 | 0.57 | 1.45 |  | 0.92 | 0.58 | 1.46 |
| <b>Between HQ and HMJH</b>     | 146 | 0.91 | 0.77 | 1.08 |  | 0.98 | 0.83 | 1.16 |  | 0.99 | 0.83 | 1.17 |
| <b>Between LQ and HMJH</b>     | 73  | 0.99 | 0.79 | 1.26 |  | 1.01 | 0.80 | 1.28 |  | 1.01 | 0.80 | 1.28 |
| <b>Within LQ</b>               | 3   | 1.06 | 0.34 | 3.29 |  | 1.02 | 0.33 | 3.16 |  | 1.01 | 0.33 | 3.14 |
| <b>Upward LQ to HQ</b>         | 494 | 1.07 | 0.97 | 1.18 |  | 1.03 | 0.93 | 1.13 |  | 1.02 | 0.93 | 1.13 |
| <b>Downward HQ to LQ</b>       | 487 | 1.03 | 0.94 | 1.14 |  | 1.01 | 0.92 | 1.12 |  | 1.01 | 0.92 | 1.12 |
| <b>Other</b>                   | 186 | 0.96 | 0.83 | 1.12 |  | 0.98 | 0.84 | 1.14 |  | 0.98 | 0.85 | 1.14 |

Note 1: HR: not adjusted. HR1: adjusted for sex, age in 2005, level of education in 2005, marital status in 2005, country of birth, any mental disorder diagnosis before 2003. HR2: adjusted for adjusted for sex, age in 2005, level of education in 2005, marital status in 2005, country of birth, any mental disorder diagnosis before 2003, parental mental disorder diagnosis, and parental socioeconomic position during childhood.

Note 2: PER=precarious employment relationship; SSE= solo self-employment; HMJH=hybrid multiple job-holding; BO= business ownership; SER= standard employment relationship; SER/Hi= standard employment relationship - high income; LQ=low quality; HQ=high quality

**Table S8a. Fully adjusted hazard ratios for specific outcomes (depression, anxiety, stress related disorders, alcohol and non-alcohol use disorders) for the total population (n=2,743,764).**

|                                | Depression |      |       |      | Anxiety |      |       |      | Stress related disorders |      |       |      | Alcohol use disorders |      |       |      | Non-alcoholic use disorders |      |       |      |
|--------------------------------|------------|------|-------|------|---------|------|-------|------|--------------------------|------|-------|------|-----------------------|------|-------|------|-----------------------------|------|-------|------|
|                                | cases      | HR2  | CI95% |      | cases   | HR2  | CI95% |      | cases                    | HR2  | CI95% |      | cases                 | HR2  | CI95% |      | cases                       | HR2  | CI95% |      |
| <b>Constant SER</b>            | 21032      | ref  | ref   |      | 17892   | ref  | ref   |      | 15085                    | ref  | ref   |      | 10933                 | ref  | ref   |      | 2187                        | ref  | ref   |      |
| <b>Constant SER/HI</b>         | 7048       | 0.70 | 0.68  | 0.72 | 5736    | 0.71 | 0.69  | 0.73 | 5821                     | 0.88 | 0.85  | 0.91 | 5565                  | 0.83 | 0.80  | 0.85 | 628                         | 0.61 | 0.56  | 0.67 |
| <b>Constant BO</b>             | 542        | 0.77 | 0.71  | 0.84 | 460     | 0.80 | 0.73  | 0.88 | 414                      | 0.96 | 0.87  | 1.06 | 562                   | 0.94 | 0.86  | 1.02 | 69                          | 0.81 | 0.63  | 1.03 |
| <b>Constant HMJH</b>           | 669        | 0.89 | 0.83  | 0.96 | 549     | 0.89 | 0.82  | 0.97 | 584                      | 1.17 | 1.07  | 1.27 | 397                   | 0.83 | 0.75  | 0.91 | 73                          | 0.91 | 0.72  | 1.15 |
| <b>Constant SSE</b>            | 1207       | 0.89 | 0.84  | 0.94 | 993     | 0.90 | 0.85  | 0.97 | 851                      | 1.02 | 0.95  | 1.09 | 1048                  | 0.99 | 0.92  | 1.05 | 132                         | 0.87 | 0.72  | 1.03 |
| <b>Constant PER</b>            | 2957       | 1.27 | 1.23  | 1.33 | 2647    | 1.23 | 1.18  | 1.28 | 2384                     | 1.32 | 1.27  | 1.38 | 1415                  | 1.25 | 1.18  | 1.32 | 450                         | 1.38 | 1.24  | 1.53 |
| <b>Constant UE</b>             | 56         | 1.50 | 1.15  | 1.96 | 46      | 1.46 | 1.09  | 1.96 | 40                       | 1.62 | 1.19  | 2.21 | 46                    | 1.90 | 1.42  | 2.55 | 22                          | 4.10 | 2.68  | 6.26 |
| <b>Constant HQ</b>             | 2232       | 0.89 | 0.86  | 0.94 | 1866    | 0.88 | 0.84  | 0.93 | 1818                     | 1.04 | 0.99  | 1.09 | 1405                  | 0.93 | 0.88  | 0.99 | 232                         | 0.81 | 0.71  | 0.93 |
| <b>Constant LQ</b>             | 501        | 1.35 | 1.23  | 1.47 | 407     | 1.24 | 1.12  | 1.37 | 373                      | 1.40 | 1.27  | 1.56 | 344                   | 1.57 | 1.41  | 1.75 | 91                          | 1.69 | 1.37  | 2.10 |
| <b>Fluctuating HQ</b>          | 1039       | 0.87 | 0.81  | 0.92 | 898     | 0.89 | 0.83  | 0.95 | 824                      | 1.00 | 0.93  | 1.07 | 742                   | 0.97 | 0.90  | 1.04 | 139                         | 0.99 | 0.84  | 1.18 |
| <b>Fluctuating LQ</b>          | 65         | 1.33 | 1.04  | 1.71 | 55      | 1.32 | 1.01  | 1.72 | 60                       | 1.77 | 1.37  | 2.29 | 48                    | 1.63 | 1.22  | 2.16 | 25                          | 3.32 | 2.23  | 4.93 |
| <b>Fluctuating HQ and HMJH</b> | 474        | 0.91 | 0.83  | 1.00 | 363     | 0.84 | 0.76  | 0.94 | 375                      | 1.07 | 0.96  | 1.18 | 265                   | 0.79 | 0.70  | 0.89 | 48                          | 0.83 | 0.62  | 1.11 |
| <b>Fluctuating LQ and HMJH</b> | 306        | 1.15 | 1.03  | 1.29 | 261     | 1.15 | 1.02  | 1.30 | 256                      | 1.38 | 1.22  | 1.56 | 188                   | 1.14 | 0.98  | 1.32 | 39                          | 1.15 | 0.84  | 1.59 |
| <b>Fluctuating LQ and HQ</b>   | 4646       | 1.03 | 1.01  | 1.07 | 3985    | 1.01 | 0.97  | 1.04 | 3779                     | 1.14 | 1.10  | 1.19 | 2570                  | 1.04 | 1.00  | 1.09 | 608                         | 1.07 | 0.98  | 1.18 |
| <b>Within HQ</b>               | 101        | 0.97 | 0.80  | 1.18 | 94      | 1.06 | 0.87  | 1.30 | 79                       | 1.13 | 0.90  | 1.41 | 76                    | 1.12 | 0.89  | 1.40 | 10                          | 0.78 | 0.42  | 1.46 |
| <b>Between HMJH and HQ</b>     | 612        | 0.89 | 0.82  | 0.97 | 468     | 0.81 | 0.74  | 0.89 | 531                      | 1.12 | 1.03  | 1.22 | 329                   | 0.81 | 0.72  | 0.90 | 46                          | 0.61 | 0.45  | 0.81 |
| <b>Between HMJH and LQ</b>     | 340        | 1.14 | 1.03  | 1.27 | 273     | 1.07 | 0.95  | 1.21 | 265                      | 1.27 | 1.13  | 1.44 | 170                   | 0.95 | 0.81  | 1.10 | 38                          | 1.05 | 0.76  | 1.45 |
| <b>Within LQ</b>               | 22         | 1.79 | 1.18  | 2.71 | 14      | 1.30 | 0.77  | 2.20 | 17                       | 2.00 | 1.25  | 3.23 | 13                    | 1.73 | 1.01  | 2.99 | 2                           | 1.16 | 0.29  | 4.65 |
| <b>Upward LQ to HQ</b>         | 2728       | 1.01 | 0.97  | 1.06 | 2428    | 1.01 | 0.97  | 1.06 | 2279                     | 1.13 | 1.08  | 1.18 | 144                   | 1.05 | 0.99  | 1.11 | 331                         | 0.99 | 0.88  | 1.11 |
| <b>Downward HQ to LQ</b>       | 2591       | 1.09 | 1.04  | 1.13 | 2253    | 1.08 | 1.03  | 1.13 | 2021                     | 1.17 | 1.11  | 1.22 | 1583                  | 1.19 | 1.13  | 1.26 | 346                         | 1.17 | 1.04  | 1.31 |
| <b>Other</b>                   | 800        | 1.05 | 0.98  | 1.12 | 693     | 1.05 | 0.97  | 1.13 | 686                      | 1.27 | 1.17  | 1.37 | 446                   | 0.97 | 0.88  | 1.07 | 103                         | 1.05 | 0.86  | 1.29 |

Note 1: adjusted for adjusted for sex, age in 2005, level of education in 2005, marital status in 2005, country of birth, any mental disorder diagnosis before 2003, parental mental disorder diagnosis, and parental socioeconomic position during childhood.

Note 2: PER=precarious employment relationship; SSE= solo self-employment; HMJH=hybrid multiple job-holding; BO= business ownership; SER= standard employment relationship; SER/HI= standard employment relationship - high income; LQ=low quality; HQ=high quality

**Table S8b. Fully adjusted hazard ratios for specific outcomes (depression, anxiety, stress related disorders, alcohol and non-alcohol use disorders) for women (n=1,275,850).**

|                                | Depression |      |       |      | Anxiety |      |       |      | Stress related disorders |      |       |      | Alcohol use disorders |      |       |      | Non-alcoholic use disorders |      |       |      |
|--------------------------------|------------|------|-------|------|---------|------|-------|------|--------------------------|------|-------|------|-----------------------|------|-------|------|-----------------------------|------|-------|------|
|                                | cases      | HR2  | CI95% |      | cases   | HR2  | CI95% |      | cases                    | HR2  | CI95% |      | cases                 | HR2  | CI95% |      | cases                       | HR2  | CI95% |      |
| <b>Constant SER</b>            | 14178      | ref  | ref   |      | 12142   | ref  | ref   |      | 10957                    | ref  | ref   |      | 4449                  | ref  | ref   |      | 1173                        | ref  | ref   |      |
| <b>Constant SER/HI</b>         | 2532       | 0.76 | 0.72  | 0.79 | 1971    | 0.73 | 0.70  | 0.77 | 258                      | 0.97 | 0.93  | 1.01 | 888                   | 0.97 | 0.90  | 1.05 | 160                         | 0.73 | 0.62  | 0.87 |
| <b>Constant BO</b>             | 127        | 0.75 | 0.63  | 0.90 | 118     | 0.83 | 0.69  | 0.99 | 124                      | 0.98 | 0.82  | 1.17 | 68                    | 1.26 | 0.99  | 1.60 | 15                          | 1.14 | 0.68  | 1.89 |
| <b>Constant HMJH</b>           | 382        | 1.01 | 0.91  | 1.11 | 309     | 0.97 | 0.87  | 1.09 | 383                      | 1.29 | 1.16  | 1.43 | 110                   | 0.99 | 0.82  | 1.19 | 34                          | 1.19 | 0.85  | 1.67 |
| <b>Constant SSE</b>            | 412        | 0.89 | 0.81  | 0.98 | 391     | 1.00 | 0.90  | 1.11 | 358                      | 1.06 | 0.95  | 1.17 | 175                   | 1.14 | 0.98  | 1.32 | 46                          | 1.23 | 0.92  | 1.66 |
| <b>Constant PER</b>            | 1707       | 1.29 | 1.22  | 1.35 | 1556    | 1.26 | 1.20  | 1.34 | 1525                     | 1.35 | 1.28  | 1.43 | 409                   | 1.24 | 1.12  | 1.38 | 158                         | 1.33 | 1.12  | 1.58 |
| <b>Constant UE</b>             | 35         | 1.28 | 0.92  | 1.80 | 26      | 1.14 | 0.77  | 1.67 | 31                       | 1.51 | 1.06  | 2.15 | 8                     | 1.14 | 0.57  | 2.28 | 2                           | 0.91 | 0.23  | 3.65 |
| <b>Constant HQ</b>             | 1051       | 0.94 | 0.88  | 1.00 | 834     | 0.88 | 0.82  | 0.94 | 974                      | 1.06 | 0.99  | 1.13 | 337                   | 1.13 | 1.01  | 1.26 | 67                          | 0.82 | 0.64  | 1.05 |
| <b>Constant LQ</b>             | 282        | 1.38 | 1.23  | 1.56 | 229     | 1.24 | 1.09  | 1.42 | 230                      | 1.39 | 1.21  | 1.58 | 86                    | 1.55 | 1.25  | 1.92 | 31                          | 1.67 | 1.16  | 2.40 |
| <b>Fluctuating HQ</b>          | 469        | 0.91 | 0.83  | 1.00 | 413     | 0.96 | 0.87  | 1.06 | 431                      | 1.03 | 0.94  | 1.14 | 144                   | 1.04 | 0.88  | 1.23 | 43                          | 1.14 | 0.84  | 1.55 |
| <b>Fluctuating LQ</b>          | 33         | 1.36 | 0.97  | 1.92 | 23      | 1.08 | 0.72  | 1.62 | 30                       | 1.57 | 1.09  | 2.24 | 11                    | 1.67 | 0.92  | 3.02 | 4                           | 1.82 | 0.68  | 4.88 |
| <b>Fluctuating HQ and HMJH</b> | 217        | 0.98 | 0.86  | 1.13 | 174     | 0.94 | 0.81  | 1.10 | 197                      | 1.12 | 0.97  | 1.29 | 67                    | 1.07 | 0.84  | 1.36 | 16                          | 0.97 | 0.59  | 1.59 |
| <b>Fluctuating LQ and HMJH</b> | 119        | 1.07 | 0.89  | 1.28 | 113     | 1.16 | 0.97  | 1.40 | 120                      | 1.34 | 1.12  | 1.60 | 39                    | 1.23 | 0.89  | 1.71 | 6                           | 0.66 | 0.29  | 1.47 |
| <b>Fluctuating LQ and HQ</b>   | 2459       | 1.06 | 1.02  | 1.11 | 2168    | 1.05 | 1.00  | 1.10 | 2237                     | 1.17 | 1.12  | 1.22 | 666                   | 1.06 | 0.98  | 1.15 | 199                         | 1.01 | 0.88  | 1.17 |
| <b>Within HQ</b>               | 43         | 1.01 | 0.75  | 1.36 | 42      | 1.16 | 0.85  | 1.57 | 39                       | 1.17 | 0.85  | 1.60 | 16                    | 1.32 | 0.81  | 2.16 | 4                           | 1.22 | 0.46  | 3.26 |
| <b>Between HMJH and HQ</b>     | 307        | 0.96 | 0.85  | 1.07 | 247     | 0.91 | 0.80  | 1.03 | 314                      | 1.22 | 1.09  | 1.36 | 85                    | 0.94 | 0.76  | 1.17 | 14                          | 0.57 | 0.34  | 0.97 |
| <b>Between HMJH and LQ</b>     | 163        | 1.24 | 1.06  | 1.44 | 138     | 1.20 | 1.01  | 1.41 | 151                      | 1.41 | 1.20  | 1.66 | 42                    | 1.12 | 0.83  | 1.53 | 10                          | 0.93 | 0.50  | 1.73 |
| <b>Within LQ</b>               | 8          | 1.61 | 0.80  | 3.22 | 5       | 1.15 | 0.48  | 2.77 | 3                        | 0.78 | 0.25  | 2.42 | 2                     | 1.56 | 0.39  | 6.23 | 0                           | NA   | NA    | NA   |
| <b>Upward LQ to HQ</b>         | 156        | 1.03 | 0.98  | 1.09 | 1402    | 1.04 | 0.98  | 1.10 | 1433                     | 1.14 | 1.08  | 1.21 | 453                   | 1.13 | 1.02  | 1.25 | 129                         | 1.02 | 0.85  | 1.22 |
| <b>Downward HQ to LQ</b>       | 1378       | 1.11 | 1.05  | 1.17 | 1262    | 1.15 | 1.09  | 1.22 | 1247                     | 1.23 | 1.16  | 1.31 | 448                   | 1.31 | 1.19  | 1.44 | 129                         | 1.23 | 1.02  | 1.47 |
| <b>Other</b>                   | 311        | 1.02 | 0.91  | 1.14 | 302     | 1.12 | 1.00  | 1.26 | 345                      | 1.37 | 1.23  | 1.53 | 87                    | 1.05 | 0.84  | 1.30 | 29                          | 1.16 | 0.80  | 1.68 |

Note 1: adjusted for adjusted for sex, age in 2005, level of education in 2005, marital status in 2005, country of birth, any mental disorder diagnosis before 2003, parental mental disorder diagnosis, and parental socioeconomic position during childhood.

Note 2: PER=precarious employment relationship; SSE= solo self-employment; HMJH=hybrid multiple job-holding; BO= business ownership; SER= standard employment relationship; SER/HI= standard employment relationship - high income; LQ=low quality; HQ=high quality

**Table S8c. Fully adjusted hazard ratios for specific outcomes (depression, anxiety, stress related disorders, alcohol and non-alcohol use disorders) for men (n= 1,467,914).**

|                                | Depression |      |       |      | Anxiety |      |       |      | Stress related disorders |      |       |      | Alcohol use disorders |      |       |      | Non-alcoholic use disorders |      |       |      |
|--------------------------------|------------|------|-------|------|---------|------|-------|------|--------------------------|------|-------|------|-----------------------|------|-------|------|-----------------------------|------|-------|------|
|                                | cases      | HR2  | CI95% |      | cases   | HR2  | CI95% |      | cases                    | HR2  | CI95% |      | cases                 | HR2  | CI95% |      | cases                       | HR2  | CI95% |      |
| <b>Constant SER</b>            | 6576       | ref  | ref   |      | 5517    | ref  | ref   |      | 3929                     | ref  | ref   |      | 6281                  | ref  | ref   |      | 980                         | ref  | ref   |      |
| <b>Constant SER/HI</b>         | 4409       | 0.85 | 0.80  | 0.90 | 3711    | 0.65 | 0.62  | 0.68 | 3163                     | 0.76 | 0.72  | 0.80 | 4621                  | 0.78 | 0.75  | 0.81 | 455                         | 0.59 | 0.52  | 0.66 |
| <b>Constant BO</b>             | 482        | 0.93 | 0.82  | 1.06 | 414     | 0.75 | 0.68  | 0.83 | 345                      | 0.87 | 0.78  | 0.97 | 583                   | 0.92 | 0.84  | 1.00 | 61                          | 0.76 | 0.59  | 0.98 |
| <b>Constant HMJH</b>           | 345        | 0.95 | 0.81  | 1.13 | 258     | 0.80 | 0.70  | 0.91 | 241                      | 1.04 | 0.91  | 1.18 | 278                   | 0.81 | 0.72  | 0.91 | 37                          | 0.79 | 0.57  | 1.10 |
| <b>Constant SSE</b>            | 913        | 0.97 | 0.87  | 1.07 | 691     | 0.82 | 0.76  | 0.89 | 548                      | 0.91 | 0.83  | 0.99 | 954                   | 0.91 | 0.85  | 0.97 | 106                         | 0.84 | 0.69  | 1.03 |
| <b>Constant PER</b>            | 1259       | 1.28 | 1.17  | 1.41 | 1101    | 1.14 | 1.07  | 1.22 | 869                      | 1.22 | 1.13  | 1.31 | 1009                  | 1.23 | 1.15  | 1.32 | 294                         | 1.45 | 1.27  | 1.66 |
| <b>Constant UE</b>             | 68         | 1.30 | 0.86  | 1.95 | 52      | 1.25 | 0.95  | 1.65 | 47                       | 1.55 | 1.16  | 2.07 | 82                    | 1.88 | 1.51  | 2.35 | 23                          | 2.86 | 1.89  | 4.33 |
| <b>Constant HQ</b>             | 121        | 1.00 | 0.91  | 1.10 | 1019    | 0.84 | 0.79  | 0.90 | 862                      | 0.97 | 0.90  | 1.04 | 108                   | 0.89 | 0.83  | 0.95 | 160                         | 0.79 | 0.67  | 0.93 |
| <b>Constant LQ</b>             | 322        | 1.45 | 1.22  | 1.71 | 257     | 1.15 | 1.01  | 1.30 | 223                      | 1.32 | 1.15  | 1.51 | 325                   | 1.56 | 1.39  | 1.74 | 79                          | 1.72 | 1.36  | 2.17 |
| <b>Fluctuating HQ</b>          | 564        | 0.93 | 0.82  | 1.06 | 479     | 0.82 | 0.75  | 0.90 | 378                      | 0.89 | 0.80  | 0.99 | 578                   | 0.94 | 0.86  | 1.03 | 93                          | 0.95 | 0.77  | 1.18 |
| <b>Fluctuating LQ</b>          | 39         | 1.37 | 0.85  | 2.22 | 41      | 1.40 | 1.02  | 1.91 | 34                       | 1.52 | 1.08  | 2.14 | 39                    | 1.41 | 1.03  | 1.94 | 21                          | 3.17 | 2.05  | 4.90 |
| <b>Fluctuating HQ and HMJH</b> | 246        | 0.79 | 0.70  | 0.90 | 184     | 0.73 | 0.63  | 0.84 | 181                      | 1.03 | 0.97  | 1.09 | 185                   | 0.72 | 0.62  | 0.84 | 31                          | 0.82 | 0.57  | 1.17 |
| <b>Fluctuating LQ and HMJH</b> | 181        | 1.21 | 0.97  | 1.51 | 139     | 0.97 | 0.82  | 1.15 | 140                      | 1.30 | 1.09  | 1.54 | 149                   | 1.05 | 0.89  | 1.24 | 32                          | 1.26 | 0.88  | 1.80 |
| <b>Fluctuating LQ and HQ</b>   | 2181       | 0.96 | 0.91  | 1.01 | 1836    | 0.92 | 0.88  | 0.97 | 1517                     | 1.04 | 0.98  | 1.10 | 1917                  | 1.02 | 0.96  | 1.07 | 410                         | 1.12 | 0.99  | 1.26 |
| <b>Within HQ</b>               | 44         | 0.92 | 0.58  | 1.46 | 44      | 1.07 | 0.79  | 1.43 | 35                       | 1.18 | 0.84  | 1.64 | 50                    | 1.16 | 0.88  | 1.53 | 7                           | 0.97 | 0.46  | 2.05 |
| <b>Between HMJH and HQ</b>     | 246        | 0.99 | 0.83  | 1.17 | 184     | 0.73 | 0.64  | 0.83 | 181                      | 0.99 | 0.87  | 1.13 | 185                   | 0.77 | 0.68  | 0.88 | 37                          | 0.75 | 0.54  | 1.05 |
| <b>Between HMJH and LQ</b>     | 184        | 1.01 | 0.80  | 1.28 | 138     | 0.92 | 0.78  | 1.09 | 117                      | 1.05 | 0.87  | 1.26 | 136                   | 0.91 | 0.77  | 1.09 | 30                          | 1.18 | 0.82  | 1.70 |
| <b>Within LQ</b>               | 13         | 1.01 | 0.33  | 3.14 | 11      | 1.64 | 0.91  | 2.96 | 14                       | 2.77 | 1.64  | 4.69 | 11                    | 1.75 | 0.97  | 3.17 | 2                           | 1.53 | 0.38  | 6.15 |
| <b>Upward LQ to HQ</b>         | 1144       | 1.02 | 0.93  | 1.13 | 1004    | 0.94 | 0.88  | 1.01 | 831                      | 1.06 | 0.98  | 1.14 | 973                   | 1.00 | 0.93  | 1.07 | 199                         | 0.98 | 0.84  | 1.15 |
| <b>Downward HQ to LQ</b>       | 1212       | 1.01 | 0.92  | 1.12 | 999     | 0.96 | 0.89  | 1.02 | 780                      | 1.02 | 0.94  | 1.10 | 1158                  | 1.13 | 1.06  | 1.21 | 218                         | 1.14 | 0.99  | 1.33 |
| <b>Other</b>                   | 494        | 0.98 | 0.85  | 1.14 | 385     | 0.94 | 0.84  | 1.04 | 348                      | 1.12 | 1.01  | 1.26 | 343                   | 0.89 | 0.80  | 0.99 | 75                          | 1.04 | 0.82  | 1.32 |



Note: adjusted for adjusted for sex, age in 2005, level of education in 2005, marital status in 2005, country of birth, any mental disorder diagnosis before 2003, parental mental disorder diagnosis, and parental socioeconomic position during childhood.

Note 2: PER=precarious employment relationship; SSE= solo self-employment; HMJH=hybrid multiple job-holding; BO= business ownership; SER= standard employment relationship; SER/HI= standard employment relationship - high income; LQ=low quality; HQ=high quality

**Figure S1. Flow chart of the (total) study population**

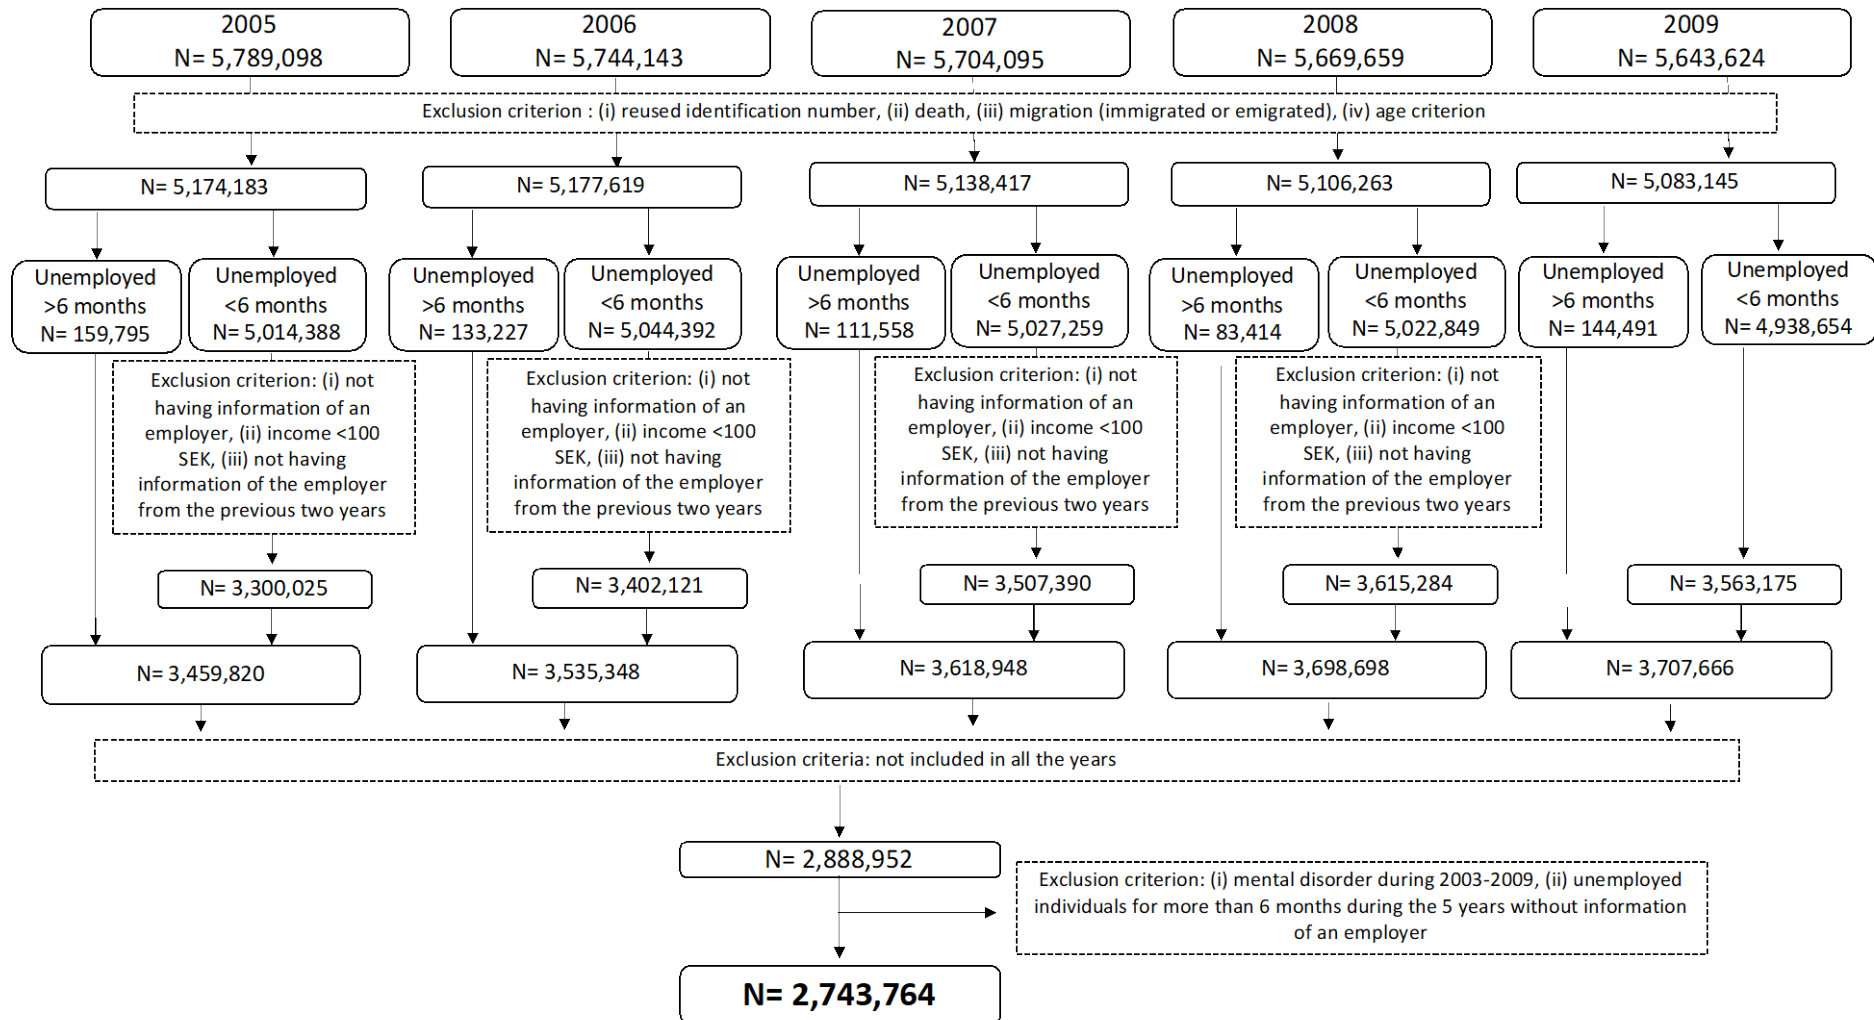

**Figure S2. Directed Acyclic Graph (DAG) for the effect of employment trajectories on mental health.**

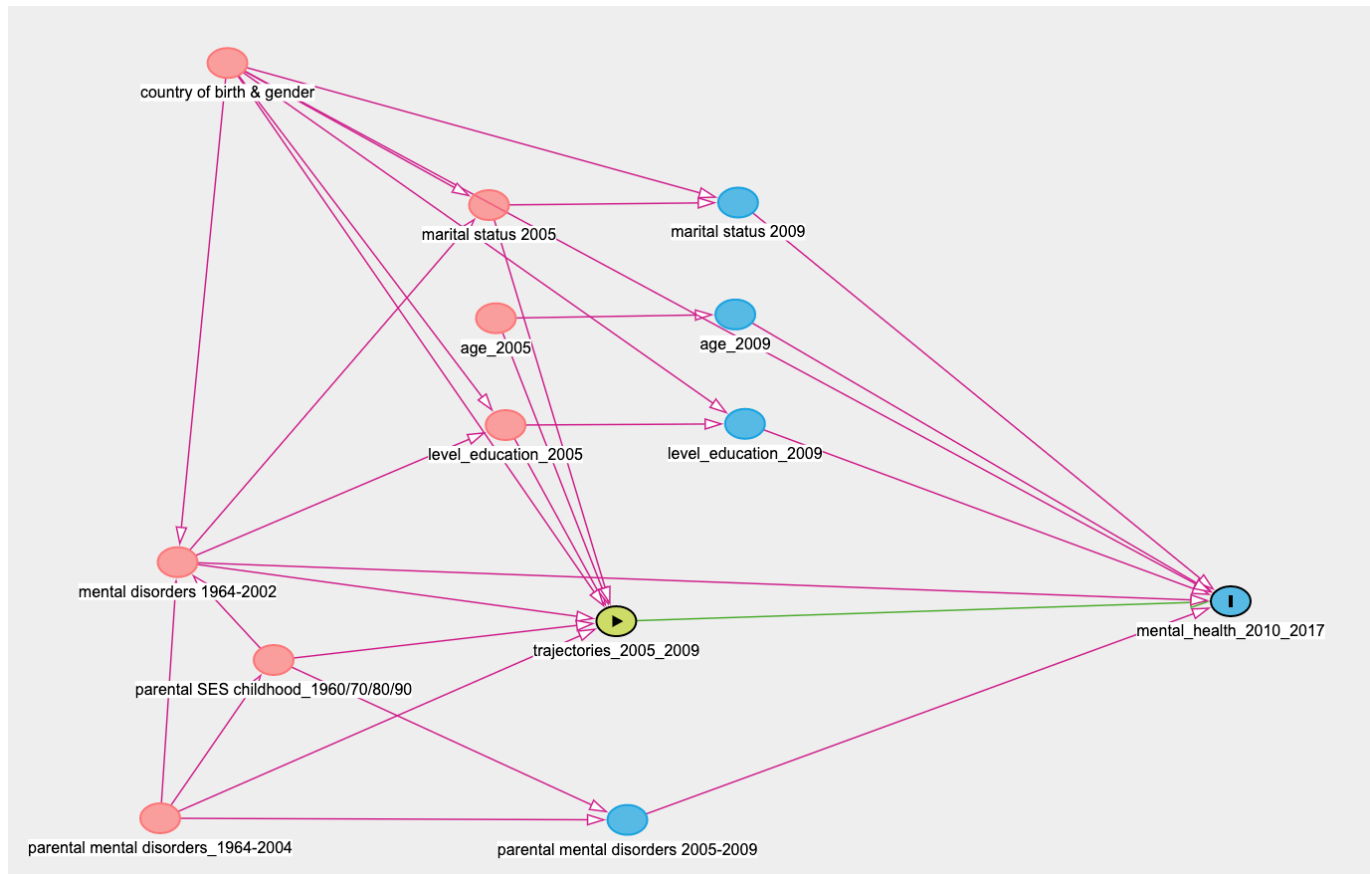

The minimal sufficient adjustment sets for estimating the total effect of the low-quality employment trajectories on mental health (mental disorders and/or suicide attempt) are several, and for this paper we have chosen the following one: age, country of birth, gender, level of education, marital status, mental disorder (diagnosis) occurring before 2003 (please note that individuals with a diagnosis of any mental disorder during 2003-2009 are excluded from the study population), parental socioeconomic position during the childhood of individuals, any parental mental disorder (diagnosis) occurring before exposure measurement.

Textor J, van der Zander B, Gilthorpe MS, Liškiewicz M, Ellison GTH. Robust causal inference using directed acyclic graphs: the R package ‘dagitty.’ *Int J Epidemiol.* 2017 Jan 15;dyw341
